1 **How ancient forest fragmentation and riparian connectivity**  
2 **generate high levels of genetic diversity in a micro-endemic**  
3 **Malagasy tree**

4  
5 Jordi Salmona<sup>1\*</sup>, Axel Dresen<sup>1</sup>, Anicet E. Ranaivoson<sup>1,2</sup>, Sophie Manzi<sup>1</sup>, Barbara Le Pors<sup>3</sup>,  
6 Cynthia Hong-Wa<sup>4</sup>, Jacqueline Razanatsoa<sup>5</sup>, Nicole V. Andriaholinirina<sup>2</sup>, Solofonirina  
7 Rasoloharijaona<sup>2</sup>, Marie-Elodie Vavitsara<sup>2</sup>, Guillaume Besnard<sup>1\*</sup>

8  
9 <sup>1</sup> CNRS-UPS-IRD, UMR5174, Laboratoire Évolution & Diversité Biologique, Université Paul  
10 Sabatier, 118 route de Narbonne, 31062 Toulouse, France

11 <sup>2</sup> Faculté des Sciences, Université de Mahajanga, BP 652 401, Mahajanga, Madagascar

12 <sup>3</sup> Instituto Gulbenkian de Ciência, Rua da Quinta Grande, 6, P-2780-156 Oeiras, Portugal

13 <sup>4</sup> Claude E. Phillips Herbarium, Delaware State University, 1200 N. Dupont Hwy, Dover, DE  
14 19901-2277, USA

15 <sup>5</sup> Herbier, Département Flore, Parc Botanique et Zoologique de Tsimbazaza, BP 4096,  
16 Antananarivo - 101, Madagascar

17  
18 \*Corresponding authors:

19 Jordi Salmona: [jordi.salmona@gmail.com](mailto:jordi.salmona@gmail.com)

20 Guillaume Besnard: [guillaume.besnard@univ-tlse3.fr](mailto:guillaume.besnard@univ-tlse3.fr)

21  
22 Number of figures: 4, all figures should be published in color.

23 Number of tables: 2

24 The Supporting Information comprises 10 method and 3 result supporting paragraphs, 10 tables,  
25 25 figures and associated references.

26

## 27 Abstract

28

29 • Understanding landscape changes is central to predicting evolutionary trajectories and  
30 defining conservation practices. While human-driven deforestation is intense throughout  
31 Madagascar, exception in areas like the Loky-Manambato region (North) raises questions.  
32 This region also harbors a rich and endemic flora, whose evolutionary origin remains poorly  
33 understood.

34 • We assessed the genetic diversity of an endangered micro-endemic Malagasy olive species  
35 (*Noronhia spinifolia*) to better understand the vegetation dynamic in the Loky-Manambato  
36 region and its influence on past evolutionary processes. We characterized 72 individuals  
37 sampled across eight forests through nuclear and mitochondrial restriction associated  
38 sequencing data (RADseq) and chloroplast microsatellites (cpSSR).

39 • Extremely high genetic diversity was revealed in the three genomic compartments  
40 (chloroplast  $h = 0.99$ , mitochondrial  $h = 0.85$ , and nuclear  $H_O = 0.07-0.20$ ). Combined  
41 population and landscape genetics analyses indicate that *N. spinifolia* diversity is best  
42 explained by the current forest cover ( $R^2 = 0.90$ ), highlighting a long-standing forest  
43 fragmentation in the region. Our results further suggest a predominant role of forest-  
44 dwelling organisms in mediating pollen and seed dispersals.

45 • This sustains a major and long-term role of riparian corridors in maintaining connectivity  
46 across those antique mosaic-habitats, calling for the study of organismal interactions that  
47 promote gene flow.

48

49 **Key words:** Habitat loss and fragmentation, Landscape genetics, Malagasy olive, Mitochondrial  
50 DNA, gene flow, connectivity, cpSSR, RADseq, Madagascar.

## 51 **Introduction**

52 Offsetting rapid anthropogenic habitat destruction and fragmentation, the primary causes of  
53 declines in global biodiversity (Fahrig, 2003; Lindenmayer & Fischer, 2013; Goudie, 2018),  
54 requires, among others, to urgently preserving connectivity (Haddad *et al.*, 2015). Although  
55 defining appropriate conservation programs largely depends on knowledge of species dispersal  
56 strategies (Sutherland *et al.*, 2004; LeBuhn *et al.*, 2015; Gardner *et al.*, 2018), these remain  
57 poorly understood, in particular in tropical biodiversity hotspots. This typically requires  
58 understanding species diversity, their dynamic, behavior and interactions across rapidly changing  
59 landscapes (Pressey *et al.*, 2007), which can be efficiently inferred from genetic data (Frankham,  
60 2010; Salmona *et al.*, 2017a).

61 Madagascar's unique biodiversity (Goodman & Benstead, 2003; Myers *et al.*, 2000),  
62 constitutes an ideal model to study evolutionary processes of diversification (Vences, 2005;  
63 Wilmé *et al.*, 2006; Vences *et al.*, 2009). Drivers of evolution, such as riverine barriers (Craul *et al.*  
64 *et al.*, 2008), refugia interconnection (Wilmé *et al.*, 2006), and habitat loss and fragmentation  
65 (Yoder *et al.*, 2016; Salmona *et al.*, 2017b), have been identified from taxonomic diversity and  
66 the genetic makeup of the Malagasy biota. However, assessing the relative and confounding  
67 effects of complex landscape dynamics (forest loss, fragmentation, barriers emergence, etc.) on  
68 population dynamics, is notoriously challenging (Nater *et al.*, 2015; Salmona *et al.*, 2017a,b;  
69 Beichman *et al.*, 2018).

70 Deforestation is among the greatest drivers of biodiversity and habitat loss, and  
71 fragmentation in Madagascar [~40-50% area since the 1950's (Harper *et al.*, 2007; Vieilledent *et al.*  
72 *et al.*, 2018)]. However, the recent documentation of the Miocene origin of the Malagasy grassland  
73 endemics (Bond *et al.*, 2008; Vorontsova *et al.*, 2016; Hackel *et al.*, 2018; Solofondranohatra *et al.*  
74 *et al.*, 2018; Salmona *et al.*, 2020) sparked a hot debate on the antiquity of open-canopy  
75 environments (Godfrey & Crowley, 2016; Joseph & Seymour, 2020, 2021). Since the genetic  
76 diversity of an organism, and its conservation implications, are the combined results of its  
77 distribution structure and history, it is crucial to assess the antiquity of landscapes, which can be  
78 questioned from genetic data [e.g. (Quéméré *et al.*, 2010; Yoder *et al.*, 2016; Salmona *et al.*,  
79 2017b, 2020)].

80 The Loky-Manambato (LM) region in northern Madagascar rose as a small-scale model-  
81 region to assess landscape antiquity and to study habitat loss and fragmentation, thanks to its  
82 perplexingly mild deforestation (Quéméré *et al.*, 2012; Salmona *et al.*, 2017b), its well-  
83 characterized matrix of forests and open-habitats, the diversity of its putative barriers to gene  
84 flow, as well as its high levels of endemism across living kingdoms (Goodman & Wilmé, 2006;  
85 Goodman *et al.*, 2018). For instance, the forest-matrix was identified as the landscape feature  
86 shaping genetic diversity across all species studied in the LM region, while the Manankolana  
87 River, showed a strong effect on *Propithecus tattersalli*, not consistently recovered in other  
88 species (Quéméré *et al.*, 2010; Rakotoarisoa *et al.*, 2013a; Sgarlata *et al.*, 2018; Aleixo-Pais *et*  
89 *al.*, 2019; Tang *et al.*, 2020). Although multiple studies on mammals attempted to describe and  
90 understand the processes that shaped its landscape and generated its diversity (Quéméré *et al.*,  
91 2012; Rakotoarisoa *et al.*, 2013b; Salmona *et al.*, 2017b; Sgarlata *et al.*, 2018, 2019),  
92 contributions on other taxa, such as plants, are crucial to draw taxonomically-broad generalities  
93 regarding the antiquity of its landscape, its connectivity and conservation.

94 Despite their long generation time, native tree species are putatively good models for  
95 landscape genetics studies in fragmented habitats, being the primary and immediate target of  
96 deforestation and landscape changes. However, only a few studies have used the genetic  
97 diversity of Malagasy plant populations (Andrianoelina *et al.*, 2009; Gardiner *et al.*, 2017;  
98 Salmona *et al.*, 2020) to infer landscape dynamics and inform conservation. The Malagasy olives  
99 (genus *Noronhia*), with a high number of taxa and a high micro-endemism rate, are among the  
100 major components of Madagascar forests and of the LM region in particular (Hong-Wa &  
101 Besnard, 2014; Hong-Wa, 2016). Among them, the Malagasy spiny olive (*Noronhia spinifolia*  
102 Hong-Wa) is mostly endemic to the dry to sub-humid forests of the LM region; and although it is  
103 relatively frequent there, it is of high conservation concern due to its narrow range. With such a  
104 distribution, *N. spinifolia*'s genetic diversity holds the potential to have retained information  
105 about the macro- and micro-evolutionary processes that have shaped the genus and species-level  
106 diversity in the region. Furthermore, being narrowly distributed, it may hold relatively low  
107 genetic diversity (Kimura, 1983) and suffer from inbreeding depression due to recent population  
108 collapse. Although its pollen and seed dispersal have yet to be studied, *N. spinifolia*'s flower and  
109 fruit morphology suggests insect pollination and animal-mediated dispersal of fruits (see below).  
110 *Noronhia spinifolia* therefore represents an excellent model to better understand Malagasy

111 olives' ecology and offers a case study to define appropriate action for dry-forests plant  
112 conservation in northern Madagascar.

113 In such sexually-reproducing plants, dispersal occurs by two means: via haploid male  
114 gametes in pollen, and via diploid embryos in seeds. Without field data, population and  
115 landscape genetics offer an alternative way to estimate effective dispersal (Holderegger *et al.*,  
116 2010; Balkenhol *et al.*, 2016). In particular, the combined use of complementary maternally and  
117 biparentally inherited genetic data [respectively from chloroplast or mitochondrial genomes  
118 (cpDNA or mtDNA) and the nuclear genome (nDNA)] allows disentangling, to a certain level,  
119 the relative contribution of seed and pollen dispersals in gene flow. For instance, the congeneric  
120 *N. lowryi* exhibited contrasting strong chloroplast and near-panmixia nuclear genetic structure  
121 suggesting a long and short distance dispersal of pollen and seed, respectively (Salmona *et al.*,  
122 2020). While progresses in sequencing technologies facilitated the generation of such genetic  
123 data for non-model organisms (Allendorf *et al.*, 2010), recent advances in spatially explicit  
124 analyses also unlocked our ability to estimate the effect of numerous collinear landscape features  
125 on genetic diversity (Balkenhol *et al.*, 2016; Prunier *et al.*, 2017). Furthermore, although the  
126 limited number of tested alternative landscape hypotheses long relied on prior knowledge or  
127 expert opinions, recent approaches iterating around a large panel of resistance values (Graves *et*  
128 *al.*, 2013) or searching for Bayesian optima (Peterman, 2018), widened the potential to  
129 identifying relevant landscape components while optimizing their cost values from the genetic  
130 data itself.

131 Here, we used genomic data from recently collected specimens of *N. spinifolia* across  
132 most of its range, the LM region. We first tested whether its restricted geographic distribution  
133 resulted in a low genetic diversity, as expected under a neutral model (Kimura, 1983), or  
134 remained relatively high as for co-distributed primates [*P. tattersalli* and *Microcebus tavaratra*  
135 (Quéméré *et al.*, 2010; Aleixo-Pais *et al.*, 2019)]. We then measured the effect of landscape  
136 components on maternally and biparentally inherited genetic diversity, to investigate patterns of  
137 seed and pollen dispersals, and assessed their congruence with those of a congeneric species  
138 from the High Plateau [*N. lowryi* (Salmona *et al.*, 2020)], and of co-distributed mammal taxa  
139 (abovementioned). From the latter, we expect open-canopy habitats and rivers to cause resistance  
140 to *N. spinifolia*'s gene-flow. In contrast, congruence with its congener from the High Plateau  
141 would imply near-panmixia on pollen-dispersed genes, but very short seed dispersal. The little

142 knowledge about its pollen and seed dispersal agents does not allow making strong predictions,  
143 except that dispersal will depend on the vectors and on their use of the landscape. We also  
144 examined whether the relative stability of the forest cover in the past 70 years (Quéméré *et al.*,  
145 2012; Salmona *et al.*, 2017b) is reflected in *N. spinifolia* genetic makeup, comparing the effect of  
146 recent and historical forest covers on gene flow, as a proxy for the temporality of its habitat  
147 fragmentation. Finally, we present the application of our work to the conservation of the LM  
148 region forest network.

## 149 **Material and methods**

### 150 **Study region**

151 The Loky-Manambato (LM) region (Daraina; Fig. 1) is a biogeographical transition zone  
152 between dry deciduous and humid forests (Goodman & Wilmé, 2006), which is delimited by the  
153 Loky and Manambato Rivers. This region is crossed by the relatively shallow Manankolana  
154 River, bordered by riparian forests along most of its course, and by a national dirt road (Fig. 1). It  
155 consists of an area of ~2,500 km<sup>2</sup> covered by ~360 km<sup>2</sup> of forests (Goodman *et al.*, 2018),  
156 fragmented into a dozen major forest patches surrounded by human-altered grasslands, dry scrub  
157 and agricultural lands. Most forests are situated at low- to mid-elevations and mostly consist of  
158 dry deciduous vegetation. In contrast, some mountain forests (Binara and Antsahabe, plus  
159 Bobankora to a lower extent) are covered by a gradient of dry deciduous, transition, humid and  
160 ericoid vegetation (Gautier *et al.*, 2006). Despite sustained grassland fires, slash-and-burn  
161 agriculture and charcoal production, as well as exploitation of wood, gold and sapphires  
162 (Fanamby, 2010; Goodman *et al.*, 2018), deforestation rate in the LM region is still relatively  
163 low (Quéméré *et al.*, 2012) compared with those of eastern and southwestern Madagascar  
164 (Vieilledent *et al.*, 2018), likely stemming from its remoteness, difficult accessibility and  
165 climate. However, to mitigate the threats, the LM region progressively became managed as a  
166 protected area by the Malagasy NGO "Fanamby" since 2005 (Fanamby, 2010; Goodman *et al.*,  
167 2018).

## 168 **Study species**

169 *Noronhia spinifolia* (Oleaceae) is a small-sized, understory tree that is easily distinguishable  
170 from other *Noronhia* species by its narrow linear leaves with a spiny tip. The plant has cream-  
171 white, urceolate, small (> 7 mm long), and hermaphroditic flowers, as well as small (> 10 mm  
172 long) and drupaceous fruits that have a thin mesocarp and a rather crustaceous endocarp (Hong-  
173 Wa, 2016). Flowering and fruiting typically occur from October to May, during the rainy season.  
174 Flower and fruit characteristics, along with observational accounts, suggest insect pollination  
175 (e.g. bees) and animal dispersal (e.g. birds, lemurs, rodents). This *Noronhia* species is micro-  
176 endemic to northern Madagascar, mainly found in the LM region except for one record from  
177 further north in Montagne des Français, and is reported mainly in semi-deciduous forests of low  
178 altitude, mostly on alkaline substrate (e.g. limestone, calc-alkaline rocks). *Noronhia spinifolia*  
179 has been assigned a preliminary conservation status of "Endangered" due to threats to its habitat  
180 (Hong-Wa, 2016).

181



182

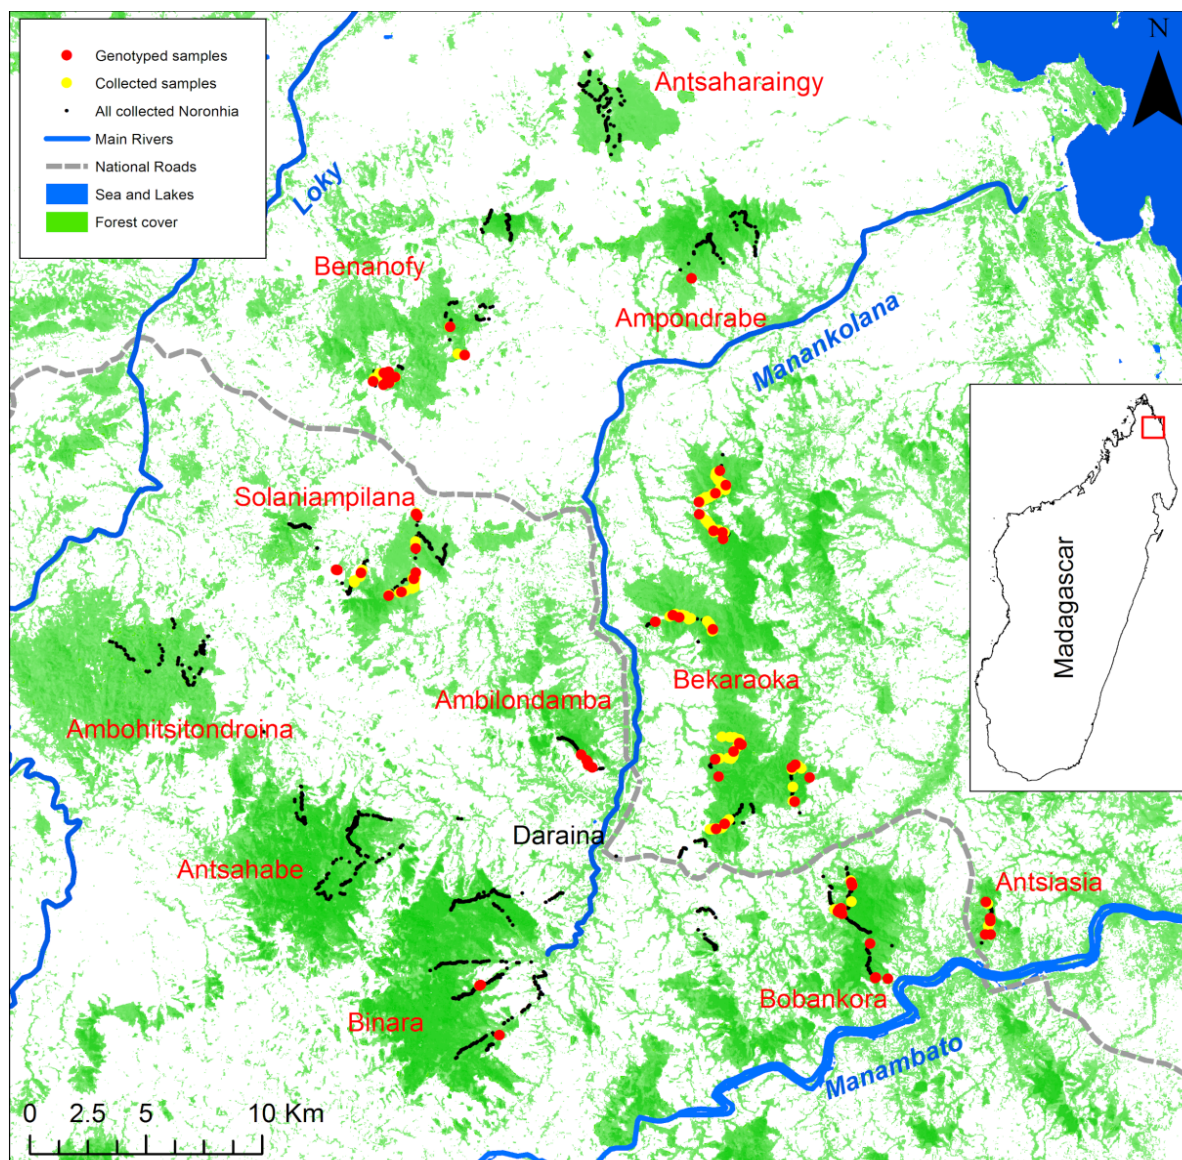

183

184 **Figure 1: Map of *Noronhia spinifolia* sampling in the Loky-Manambato (LM) region.**

185 The small black points represent samples collected for all *Noronhia* species (ca. 30 distinct taxa)  
186 and illustrate the survey effort conducted in the region. The yellow and red dots represent  
187 *N. spinifolia* samples, with the red dots corresponding to samples included in our genomic  
188 analyses. The forest cover is adapted from Hansen *et al.* (2013). Pixels with less than 30% tree  
189 cover are represented in white. The remaining tree cover percentage values are represented from  
190 light green (30%) to dark green (100%). This forest cover representation also illustrates the  
191 presence of riparian forests along streams of the LM region.



## 192 **Plant sampling**

193 To sample *N. spinifolia* populations, we surveyed all major forests of the LM region (Fig. 1) in  
194 2017 and 2018, during the dry season (July-September), and used topography (altitude and  
195 shape) as a sampling guide to maximize the representation of all landscape features. Most  
196 surveys started from the forest edge at low altitude towards the forest core at higher elevation.  
197 We identified *Noronhia* species based on tree characteristics, leaf morphology and tissue  
198 structure, and collected leaf samples of 220 *N. spinifolia* trees, preserved in silica gel for DNA  
199 conservation. We prioritized fully-grown mature tree sampling because much of the density-  
200 dependent mortality takes place before maturity in trees, and their effective population size  
201 contributing to the genetic diversity is thus closer to the actual adult census size than to the size  
202 of the entire population including young trees and seedlings (Dodd *et al.*, 1999; Petit & Hampe,  
203 2006). Therefore, the regional patterns of diversity are expected to be better represented by adult  
204 samples. For each tree, we systematically recorded its height, diameter and reproductive state, as  
205 well as its geographical coordinates (GPS) and elevation. For all forests, at least one specimen  
206 voucher was prepared and deposited at the herbarium of the Parc Botanique et Zoologique de  
207 Tsimbazaza (TAN).

## 208 **Laboratory procedures**

### 209 DNA extraction, organellar and nuclear genotyping

210 We extracted DNA from 137 samples of *N. spinifolia* using a commercial protocol adapted to  
211 plants, followed by quality control procedures ensuring high quality genomic DNA. We  
212 subsequently genotyped 72 high DNA quality samples (Fig. 1, Methods S1); a cost-effective  
213 subsampling that nonetheless maximizes geographic and altitudinal representation, and also  
214 prioritizes reproductively mature and fully-grown trees with a targeted sequencing depth >15×.  
215 Using a two-pronged approach, we genotyped 15 chloroplast microsatellites (cpSSR) and one  
216 mitochondrial microsatellite (mtSSR), originally developed on *Olea europaea* (Table S1,  
217 Methods S2, S3; Besnard *et al.*, 2011), and also used restriction associated DNA sequencing  
218 (RADseq; generating data from the biparentally inherited nuclear genome and the mitogenome;  
219 Methods S4). RADseq consists in sequencing regions neighboring restriction sites, to obtain

220 homologous sequences across individuals, spread across the genome, at a decent coverage and a  
221 reasonable cost (Baird *et al.*, 2008; Andrews *et al.*, 2016).

## 222 **Data processing**

223 Organellar RADseq loci and *de-novo* assembly of the nuclear loci catalog

224 After ad-hoc demultiplexing and cleaning of reads (Methods S4), we screened the organellar  
225 genomes using bwa-mem sequence alignment (Li, 2013) to the *N. clarinerva* mitogenome and *N.*  
226 *spinifolia* plastome (MW202230 and MT081057, respectively; Methods S5). We identified ten  
227 mitochondrial *SbfI* RAD loci *in silico*, from which haplotypes were called using ANGSD v0.92  
228 (Nielsen *et al.*, 2012; Korneliussen *et al.*, 2014), based on their highest effective base depth  
229 (Wang *et al.*, 2013). Conversely, no cpDNA RAD locus was recovered, confirming *in silico*  
230 analyses (Methods S5).

231 A catalog of nuclear tags (loci) was *de-novo* optimized (Methods S6) by iterating around  
232 the core parameters of Stacks (Rochette *et al.*, 2019) to maximize the amount of available  
233 biological information (Paris *et al.*, 2017). The final catalog was further cleaned (Methods S6)  
234 for exogenous contaminants using DeconSeq (Schmieder & Edwards, 2011) and endogenous  
235 orthologs using MUMmer (Kurtz *et al.*, 2004).

236 RADseq genotyping

237 We used two fundamentally distinct genotyping approaches to ensure the robustness of our  
238 results: single nucleotide polymorphism (SNPs) called in Stacks, and genotype likelihoods (GLs)  
239 estimated with ANGSD (Methods S7). GLs retain information about uncertainty in base calls,  
240 which alleviates some issues associated with RADseq data such as unevenness in sequencing  
241 depth and allele drop-outs (Pedersen *et al.*, 2018; Warmuth & Ellegren, 2019; Heller *et al.*,  
242 2021).

## 243 **Landscape genetics**

244 We conducted complementary analyses to assess the effect of landscape components on the  
245 genetic diversity of *N. spinifolia*. We first investigated the raw patterns of genetic diversity and

246 structure without priors to describe the major trends and build hypotheses. Then, using univariate  
247 approaches under an isolation-by-resistance model (IBR; McRae, 2006), we assessed the effect  
248 of each landscape component, iterating through their cost and resolution. Finally, using a  
249 multivariate model considering spatial autocorrelation and multicollinearity, we assessed the  
250 contribution of selected landscape components.

## 251 Genetic diversity

252 We assessed the proportion of heterozygous genotypes ( $H_E$ ) from nuclear genotype likelihoods  
253 (GL) based on folded site frequency spectra estimated in ANGSD. We further estimated  
254 organellar diversity ( $h$ ), the probability that two haplotypes are different (Nei, 1987).

## 255 Population structure

256 We assessed the level of genetic differentiation among localities with Reynolds' weighted  $F_{ST}$   
257 (Reynolds *et al.*, 1983) from GL inferred in ANGSD. We explored the genetic structure of our  
258 study system through naive clustering analyses (Methods S8), based on ANGSD GLs using  
259 NgsAdmix v32 (Skotte *et al.*, 2013) and on Stacks called genotypes using ADMIXTURE v1.3.0  
260 (Alexander *et al.*, 2009), and with a principal component analysis (PCA) from GLs with  
261 PCAnsgd. We estimated the level of organellar genetic differentiation among forests with Nei's  
262 weighted  $F_{ST}$  (Nei, 1973) using the R package *hierfstat*. We also investigated the phylogenetic  
263 structure of organellar DNA data using minimum spanning networks of genetic distances (see  
264 below) constructed with the R package *poppr* (Kamvar *et al.*, 2015).

## 265 Genetic distances

266 We assessed the power of several individual pairwise estimates of genetic relationships  
267 (distances or relatedness) from chloroplast, mitochondrial and nuclear data. For cpSSR data, we  
268 used the Bruvo's and Prevosti's genetic distances (Prevosti *et al.*, 1975; Bruvo *et al.*, 2004).  
269 From mtRAD SNPs, we inferred Euclidian and Manhattan distances. We estimated an overall  
270 genetic distance for organellar genomes by combining weighted Manhattan mtDNA and Bruvo's  
271 cpDNA distances (Methods S3).

272 We estimated the covariance of nuclear RADseq GLs (Meisner & Albrechtsen, 2018), as  
273 well as Hall's and Vieira's metrics (Hall *et al.*, 2012; Vieira *et al.*, 2013) in PCAnsgd. Using

274 nuclear SNP data, we also computed Nei's genetic distance (Nei, 1972) and Yang's relatedness  
275 (Yang *et al.*, 2010) in the *StAMPP* R package (Pembleton *et al.*, 2013).

## 276 Isolation by distance

277 We investigated patterns of isolation by distance (IBD) to assess how the geographic distance  
278 alone explains the genetic diversity (Wright, 1943; Slatkin, 1993). We used Mantel tests (Mantel,  
279 1967) between individual geographic and genetic distances (Methods S9). Since IBD may be  
280 limited to a certain scale (e.g. Keller & Holderegger, 2013; Van Strien *et al.*, 2015; Cayuela *et*  
281 *al.*, 2019), we compared subsets of pairwise data defined by a maximum geographic distance (S)  
282 between samples (Methods S9).

## 283 Isolation by resistance

284 Landscapes are rarely homogeneous, and gene flow may be limited or facilitated by its  
285 components. We used an IBR approach (McRae, 2006) to assess the cost associated with  
286 effective dispersal through each landscape feature.

### 287 *Landscape variables, cost and resolution*

288 As *N. spinifolia* was recently described and occurs in a remote area (Hong-Wa, 2016), we had  
289 little prior knowledge on the landscape variables that may affect pollen and seed dispersal. We  
290 therefore assessed the effect of most available landscape variables (Table 1; Methods S10). To  
291 test if the genetic diversity of old trees may be better explained by past forest cover, we used  
292 forest cover data from 1953, 1973, and 2000s (Hansen *et al.*, 2013; Vieilledent *et al.*, 2018).

293 Although strong priors associating a landscape component to a particular cost may be  
294 available for well-studied species (e.g. Dellicour *et al.*, 2019; Quéméré *et al.*, 2010), landscape  
295 variables and their associated cost are often chosen almost arbitrarily when little or no data are  
296 available (Beier *et al.*, 2008, 2011). To identify the variable-cost associations that matter for our  
297 study system, we iteratively tested 14 conductance-resistance values (Methods S10). Similarly,  
298 organisms do not necessarily perceive each environmental component at the same resolution (or  
299 granularity: Baguette & Van Dyck, 2007; Everson & Boucher, 1998; Laurance *et al.*, 2007;  
300 Murcia, 1995). To identify the variable-cost-granularity relevant for *N. spinifolia*, we tested four  
301 pixel resolutions (Methods S10).

302 **Table 1: Landscape variables.**

| Variable              | Abbreviation   | Type       | Univariate effect | Unique contribution |
|-----------------------|----------------|------------|-------------------|---------------------|
| Geographic distance   | IBD            | Continuous | RES               | NS*                 |
| Rivers                | Rivers         | Discrete   | NA                | NS*                 |
| Streams               | Streams        | Discrete   | NA                | NS                  |
| Roads                 | Roads          | Discrete   | NA                | NS                  |
| Trails                | Trails         | Discrete   | NA                | NS                  |
| Slope                 | Slope          | Continuous | NA                | NS*                 |
| Wind                  | Wind_November  | Continuous | NA                | NS                  |
| % tree cover          | %_tree_cov     | Continuous | CON               | CON*                |
| % tree cover discrete | %_tree_cov_dis | Discrete   | CON               | CON                 |
| Forest cover ~2000    | Veg_2000       | Continuous | CON               | CON                 |
| Forest cover ~1973    | Veg_1973       | Continuous | CON               | CON                 |
| Forest cover ~1953    | Veg_1953       | Continuous | NA                | NS                  |

303  
304 RES = variable exhibiting resistance; CON = variable exhibiting conductance; NA = no major  
305 effect detected; NS = non-significant unique contribution; \* variable included in the final model  
306 presented in the main manuscript.

### 307 *Movement models*

308 To determine which dispersal model best applies to *N. spinifolia*, we used both the Least Cost  
309 Path (LCP) and the Circuit Theory (CT). These two approaches, respectively, consider the least  
310 cost trajectory and the cost of all possible trajectories (McRae & Beier, 2007). We computed  
311 landscape distances using the R package *gdistance* (Van Etten, 2012).

### 312 *Statistical procedures*

313 We used a two-step procedure to first select landscape components, as well as their best fitting  
314 cost, resolution, and movement model, and then, to assess their unique and common  
315 contributions to the spatial structure of *N. spinifolia*'s genetic diversity.

316 We estimated the correlation between geographic or landscape distance and genetic  
317 matrices (i.e. Landscape variables and Genetic distances as described above) using Mantel tests  
318 (Mantel, 1967) in the R Package *vegan* (Dixon, 2003). We retained variables showing a better fit  
319 ( $R^2$ ) than IBD, exhibiting sensitivity to cost values (i.e. variables with a fixed fit across all cost  
320 values were discarded), and selected their best fitting cost, movement model, and resolution. We  
321 modeled the contribution of the retained landscape variables using logistic regressions on  
322 distance matrices [LRDM] (Smouse *et al.*, 1986; Prunier *et al.*, 2015), a statistical procedure that



323 is similar to classical multiple ordinary least-square regressions, except that the significance of  
324 model fit (multiple  $R^2$ ) is assessed through permutations of the dependent matrix (Legendre *et*  
325 *al.*, 1994). We finally disentangled multicollinearity among variables and decomposed their  
326 unique and common contributions using commonality analyses (CA; Prunier *et al.*, 2015).  
327

## 328 **Results**

### 329 **Species occurrence**

330 We sampled *N. spinifolia* in eight of the 11 surveyed major forests of the LM region (Fig. 1).  
331 The species occurs from low to medium elevation, between 87 and 505 m, but with strong  
332 discrepancies among forests (Fig. S1). While it was mainly recorded in dry forests, it was  
333 surprisingly found in dry to wet transition forests at medium elevation (451-505 m) in Binara.  
334 Furthermore, the species was not found in three major forest patches of the LM region - namely  
335 Antsahabe, Ambohitsitondroina and Antsaharaingy - despite (i) large prospection efforts in these  
336 forests, and (ii) apparently similar habitat as the neighboring forests harboring the species (Fig.  
337 1).

### 338 **Organelar DNA genotyping and nuclear catalog construction**

339 Of the 15 chloroplast microsatellites, 14 showed polymorphism (Table S2), and allowed  
340 distinguishing 55 chlorotype profiles among 72 trees (Results S1). The ten mitochondrial RAD  
341 loci (mtRAD) allowed identifying 11 SNPs (Results S1; Table S3). The combination of mtRADs  
342 and the mtSSR locus permits the identification of 15 mitotypes among 72 trees (Table 2). The  
343 cpSSR markers showed low to moderate linkage disequilibrium (LD; Fig. S2), a likely  
344 consequence of microsatellite-repeat-length homoplasy. Meanwhile, the mtDNA markers  
345 showed either high (among seven loci) or no LD (Fig. S3). Because SNPs are expected to be  
346 more stable (unlikely homoplasy) than SSRs, no LD between SNP loci was not expected, and  
347 could indicate recombination in the mitogenome. Finally, the overall LD among mtDNA and  
348 cpDNA markers (Fig. S4) suggests that they are both maternally inherited, although paternal  
349 leaks may occur occasionally.

350 The nuclear catalog parameter space exploration iterating around the core parameters for  
351 Stacks [i.e.  $m$  – the minimum number of reads required to build a stack,  $M$  – the maximum  
352 number of differences between stacks of an individual allowed when building a locus; and  $N$  –  
353 the maximum number of differences between loci of multiple individuals allowed when building  
354 a loci] allowed selecting values ( $m = 4$ ,  $M = 5$ ,  $N = 8$ ) that offer a trade-off between the coverage,

355 loci number, and SNP number, while limiting the number of paralogs and the presence of  
356 contaminants (Figs S5-7; Results S2). The SNP-calling procedure showing low ability to recover  
357 the genetic makeup of *N. spinifolia* (when compared to the GL-based procedure; Figs S8-13), we  
358 therefore limited its use to preliminary analyses (ADMIXTURE & genetic distances) and  
359 proceeded with the GL-based procedure for downstream analyses.

## 360 Genetic diversity

361 Chloroplast microsatellites revealed a relatively high genetic diversity with only two chlorotypes  
362 shared by individuals from more than one forest, resulting in a high probability that two  
363 randomly sampled haplotypes are different ( $h = 0.99$ ) and a mean allelic richness ( $A_r$ ; estimated  
364 for five individuals) of 2.41 (Table 2). Consequently, most forests showed an extremely high  
365 cpSSR genetic diversity ( $h > 0.92$ ) with the exception of Binara that appeared slightly less  
366 diverse ( $h = 0.73$ ; Table 2). A relatively high mitotype diversity was also revealed [ $h = 0.85$   
367 (ranging from 0.66 to 0.97 per forest),  $A_r = 2.12$ ]. Similarly, most sampled individuals exhibit  
368 relatively high levels of nuclear diversity with ~7 to ~20% of polymorphic sites and large  
369 discrepancies within and among forests (Table S1; Fig. S14). This diversity is not  
370 homogeneously distributed in space, and higher levels of genetic diversity seem to occur in the  
371 area from Solaniampilana to southern Bekaraoka (Fig. S15). Furthermore, genetic diversity does  
372 not seem influenced by altitude (Fig. S16).

373 **Table 2: Chloroplast and mitochondrial summary statistics.**

| Forests        | cpSSR |       |      |       | mtRAD |       |      |       |
|----------------|-------|-------|------|-------|-------|-------|------|-------|
|                | N     | $n_h$ | $h$  | $A_r$ | N     | $n_h$ | $h$  | $A_r$ |
| Ambilondamba   | 6     | 5     | 0.98 | 2.22  | 6     | 4     | 0.97 | 2.16  |
| Ampondrabe     | 1     | 1     | -    | -     | 1     | 1     | -    | -     |
| Antsiasia      | 6     | 4     | 0.92 | 2.67  | 6     | 3     | 0.81 | 2.14  |
| Bekaraoka      | 25    | 19    | 0.99 | 2.38  | 22    | 5     | 0.66 | 2.04  |
| Benanofy       | 11    | 8     | 0.94 | 2.39  | 11    | 4     | 0.78 | 2.26  |
| Binara         | 5     | 2     | 0.73 | 2.36  | 5     | 2     | 0.73 | 2.05  |
| Bobankora      | 11    | 10    | 0.99 | 2.45  | 11    | 3     | 0.73 | 2.04  |
| Solaniampilana | 10    | 8     | 0.97 | 2.37  | 10    | 5     | 0.87 | 2.17  |
| Total / Mean   | 75    | 55    | 0.99 | 2.41  | 72    | 15    | 0.85 | 2.12  |

374  
375 N = number of analyzed individuals;  $n_h$  = number of haplotypes;  $h$  = haplotype diversity;  $A_r$ :  
376 allelic richness (estimated for five individuals).

## 377 **Population structure**

378 The chloroplast and mitochondrial data both revealed substantial differentiation among forests  
379 ( $F_{ST}$  estimates ranging from 0.040 to 0.393 for cpSSRs; and 0.005 to 0.661 for mtRADs). As  
380 expected, a strong differentiation was also observed when combining cpDNA and mtDNA data  
381 ( $F_{ST}$  estimates ranging from 0.101 to 0.401; Table S4). The Solaniampilana-Benanofy forest  
382 cluster was clearly distinguished from other forests for both mtDNA and cpDNA (Figs S17-18),  
383 while Bekaraoka and Bobankora showed limited divergence with their neighboring forests.  
384 Haplotype networks based on cpSSR and/or mtRAD data also revealed that one maternal lineage  
385 is unique to Solaniampilana and Benanofy (Fig. 2). Furthermore, the geographic Euclidean  
386 distances showed low, but highly significant, power at explaining genetic distances among  
387 individuals ( $R^2$  [cpSSR]: 11.7%;  $R^2$  [mtRAD]: 20.7%; and  $R^2$  [cpSSR + mtRAD]: 21.3%; Figs  
388 S13, S19; Results S3).

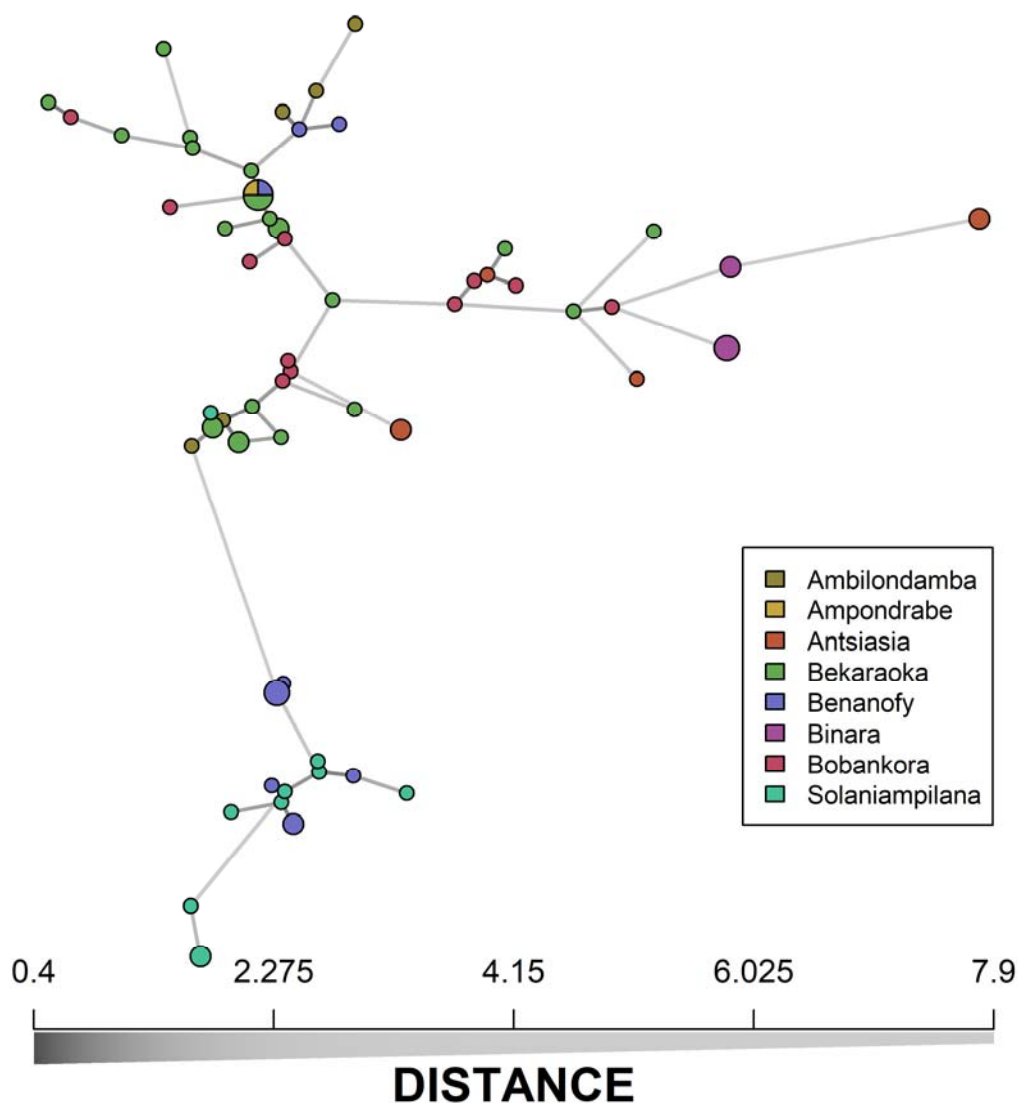

389

390 **Figure 2: Organellar DNA haplotype network of *Noronhia spinifolia*.**

391 Line length and grey scale are proportional to the Bruvo's cpDNA + Manhattan mtDNA  
392 combined genetic distances between distinct organellar haplotypes. Pie chart size is proportional  
393 to the occurrence number of a given haplotype. All edges of equal weight are represented.  
394 Distances among haplotypes are represented both through longer edges and the grey scale. The  
395 network highlights the huge organellar DNA diversity in *N. spinifolia*, with only one haplotype  
396 shared by individuals from at least two forests. It further shows a limited spatial structure, with,  
397 for instance, haplotypes from Solaniampilana and Benanofy grouping together at the bottom of  
398 the network.

399

400  $F_{ST}$  estimates based on nuclear markers (Table S5) ranged from 0.089 to 0.210, indicating  
401 that most forests are differentiated from each other. However, we found no strong structure in  
402 sub-populations, with no particular support for number of clusters >1, both for GL- and SNP-



403 based analyses (Figs S8-9). Instead, we found a clear northwest-southeast signal of continuous  
 404 genetic differentiation across space, through GL-based PCA (First axis, ~15% of the variance  
 405 explained; Fig. S20), clustering (Figs 3, S10-11), and IBD analyses (Figs S13, S19). The  
 406 observed continuous structure is well illustrated by the clustering structure for  $K = 3$  that shows  
 407 admixed patterns at sampling sites (Fig. 3). We found a clear IBD signal explaining up to 56.6%  
 408 of the among-individuals nuclear GL covariance (Fig. S19).

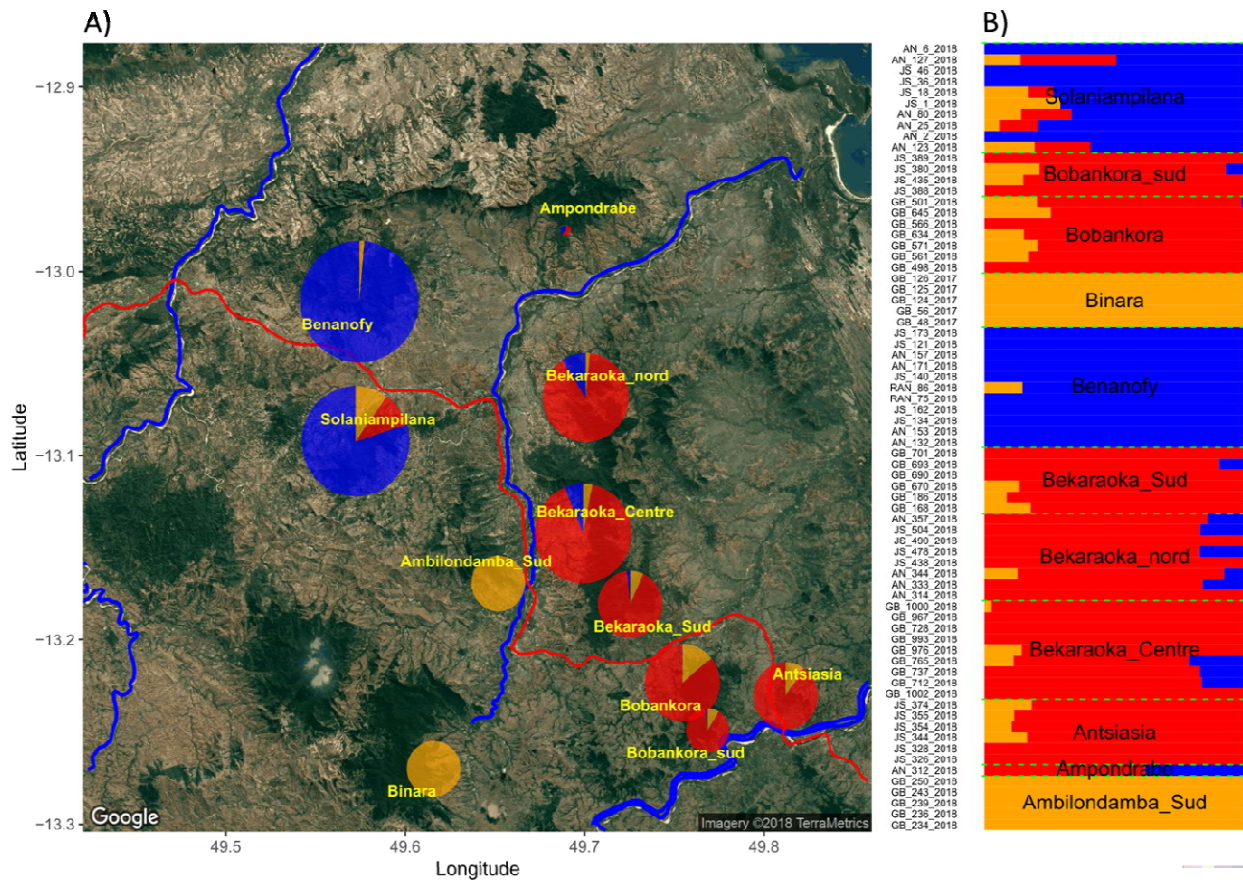

409  
 410 **Figure 3: Spatial genetic structure of *Noronhia spinifolia* in the Loky-Manambato region.**  
 411 NgsAdmix ancestry proportions (for  $K = 3$  genetic clusters) represented either (A) spatially by  
 412 sampling site, or (B) per individual. Size of pie charts (in A) is proportional to the number of  
 413 samples per site. Pie shares represent the sums of individual ancestry proportions that are shown  
 414 in B. Results are arbitrarily represented for  $K = 3$ , according to the likelihood and deltaK results  
 415 in Fig. S8, because this  $K$  value best illustrates the continuous pattern of structure inferred using  
 416 ngsAdmix and other approaches.  
 417

## 418 **Landscape genetics**

419 The optimization of resistance surfaces through univariate comparison of genetic and landscape  
420 distances (IBR) showed lower fit for cpDNA ( $R^2$  max ~0.14) than for mtDNA ( $R^2$  max ~0.38)  
421 and nDNA ( $R^2$  max ~0.90). Among the four vegetation layers, the continuous and discrete  
422 percent tree cover layer always exhibited the highest fit for conductance values at high resolution  
423 with cpDNA, mtDNA and nDNA ( $R^2 = 0.14$ ; 0.38 and 0.90, respectively; Figs S21- 24). In other  
424 words, the percent tree cover data alone shows a strong conducting effect on gene flow and  
425 explains a very large portion of the genetic variation ( $R^2 = 0.90$ ). Altogether the parameter space  
426 exploration reveals a strong effect of all forest cover layers, whereas some other variables (i.e.,  
427 rivers, roads and slope) may have subtle lower effects too. To build multivariate models, we  
428 retained in priority landscape variables showing a better fit ( $R^2$ ) than the null model considering  
429 IBD alone, and exhibiting sensitivity to cost values (e.g. % forest cover). Our results combining  
430 LRDM and CA confirmed that forest cover was the best landscape predictor of genetic  
431 differentiation, releasing other landscape components and IBD to account mostly for collinearity  
432 with the forest cover (Fig. 4; Table S6). This pattern was consistent across organellar and nuclear  
433 DNA (Table S6), and the high quality percent tree cover from Hansen *et al.* (2013) was always  
434 the best forest cover predictor (Table S6). The 2000's forest covers all better fit genetic diversity  
435 than the 1953 and 1973 forest covers, meaning we did not recover particular effect of the  
436 documented forest-cover changes on the genetic diversity of *N. spinifolia*.

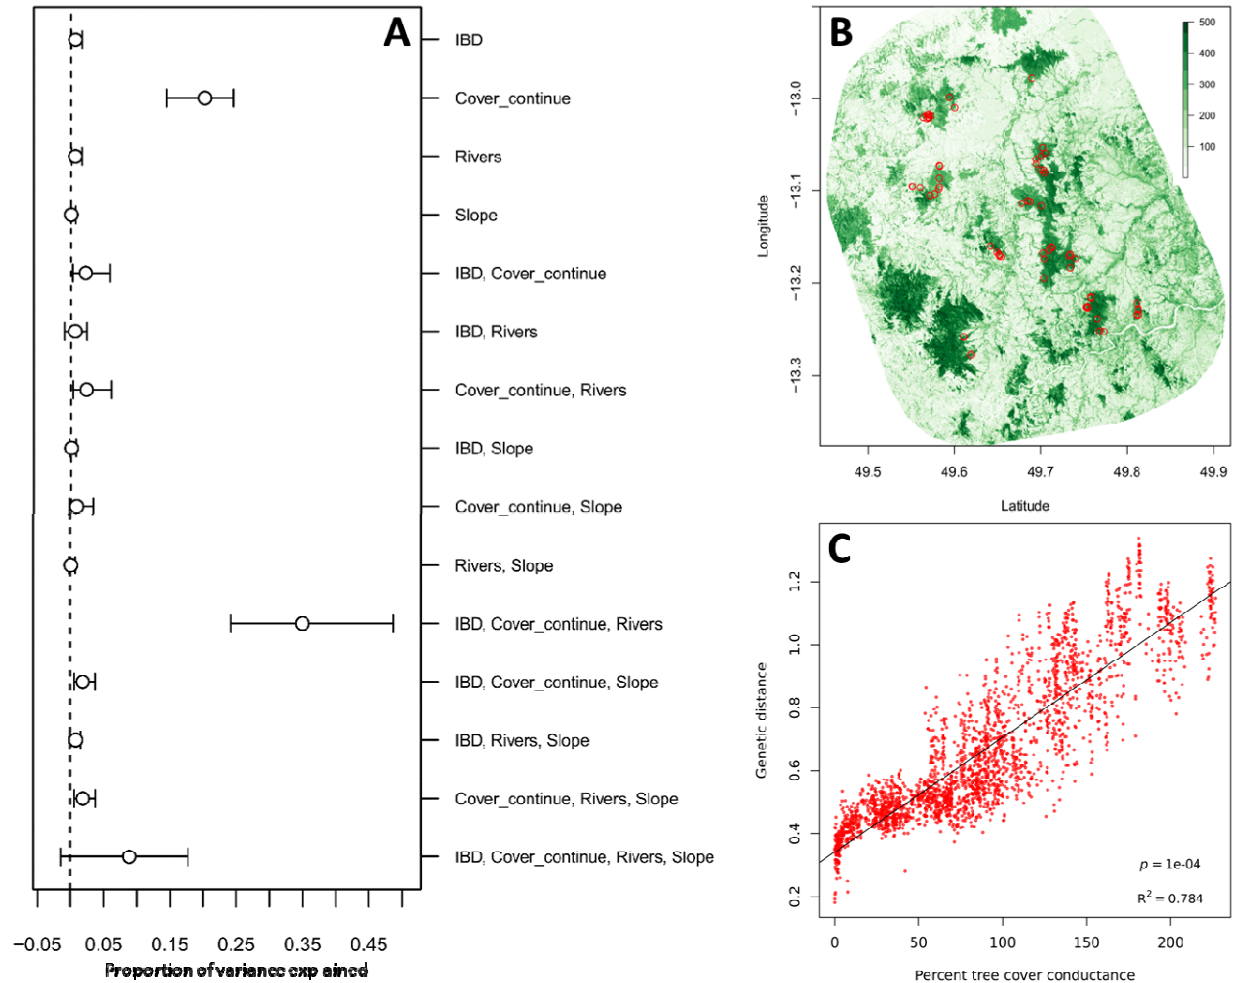

437

438 **Figure 4: Landscape contribution to nuclear gene flow in *Noronhia spinifolia*.**

439 **A)** Unique and common contributions of four selected landscape variables to nuclear gene flow,  
 440 estimated using commonality analysis. **B)** Geographic representation of the percent tree cover  
 441 conductance (inverse of cost), which illustrates the landscape conductance. **C)** Graphic  
 442 representation of the relationship between percent tree cover conductance and genetic distances  
 443 (isolation by resistance). This figure illustrates a strong conducting effect of forest cover (percent  
 444 tree cover) on the connectivity of *N. spinifolia*, and it further shows that Euclidean geographic  
 445 distance (IBD), the Manankolana River (Rivers) and the topology (Slope) have very low unique  
 446 contribution, if any, to *N. spinifolia* nuclear gene flow. Cover\_continue: Percent tree cover,  
 447 conductance = 5; IBD: Isolation by distance, resistance = 1; Rivers: resistance = 5; Slope:  
 448 conductance = 5.

449

## 450 Discussion

451 From a comprehensive and extensive sampling of *Noronhia spinifolia* in its core distribution  
452 area, and leveraging the rare combination of nuclear and mitochondrial RADseq data with  
453 cpDNA microsatellites, this study allowed us to reveal a strong effect of forest cover on gene  
454 flow in a fragmented habitat in northern Madagascar. We not only report a surprisingly high  
455 organellar and nuclear genetic diversity unevenly distributed in space, but also found that GL-  
456 based approaches were able to recover much more information than SNP-calling approaches in  
457 our model species. Moreover, the iterative optimization of resistance surface allowed identifying  
458 outstanding landscape variables with a strong effect on the connectivity of *N. spinifolia*. Finally,  
459 we show that recent forest cover better explains the genetic structure of *N. spinifolia* than more  
460 ancient ones.

### 461 ***Noronhia spinifolia*, a highly diverse Malagasy micro-endemic**

462 Our analyses exhibit unexpectedly high chloroplast ( $h = 0.99$ ; 55 chlorotypes for 72 individuals),  
463 mitochondrial ( $h = 0.85$ ; 15 mitotypes), and nuclear (~7-20% polymorphic sites) genetic  
464 diversity in a micro-endemic Malagasy tree species.

465 Firstly, the cpDNA diversity is tremendously higher than that of another micro-endemic  
466 congener of the High Plateau (*N. lowryi*) when using the same 15 cpSSR loci [6 haplotypes in 77  
467 individuals;  $h = 0.58$  (Salmona *et al.*, 2020)]. More surprisingly, more cpDNA haplotypes and  
468 diversity were revealed in 72 *N. spinifolia* individuals than in 1263 wild olive trees from the  
469 whole Mediterranean basin [47 chlorotypes;  $h_{cp} = 0.35$  (Besnard *et al.*, 2013)] and thus across  
470 very different geographic scales (LM region = 900 km<sup>2</sup> vs Mediterranean basin = ~2.5 Million  
471 km<sup>2</sup>) and despite the use of more polymorphic cpSSRs ( $n = 35$ ) in olive. Similarly, the  
472 *N. spinifolia* mtDNA diversity is also higher than in the Mediterranean olive [4 mitotypes;  $h_{mt} =$   
473  $0.58$ ; (Besnard *et al.*, 2002)], although comparable diversity levels have been revealed in other  
474 plant groups exhibiting large mitogenomes with high mutation rates as *Silene vulgaris* in Central  
475 Europe [30 mitotypes;  $h = 0.94$ ; (Štorchová & Olson, 2004)]. Finally, the nuclear genomic  
476 diversity is ~20-40 times higher than that estimated in poplar populations across all Eurasia (Ma  
477 *et al.*, 2018). For the sake of an approach-based comparison, the diversity is also twice as large



478 as in five eastern-Madagascar mouse lemurs and two orders of magnitude higher than in African  
479 plains zebra both estimated using RADseq data and a GL-based analytical procedure (Pedersen  
480 *et al.*, 2018; Poelstra *et al.*, 2021). This high genetic diversity is particularly unexpected for a  
481 narrowly distributed micro-endemic, and thus threatened, species.

482 Although high standing genetic diversity is common in forest trees, the relative  
483 importance of the multiple mechanisms generating and maintaining this diversity are still  
484 debated (Petit & Hampe, 2006; Scotti *et al.*, 2016; Isabel *et al.*, 2020). In *N. spinifolia*, several  
485 non-exclusive evolutionary mechanisms may explain such an exceptionally high intraspecific  
486 genetic diversity. Firstly, it suggests that a long-term maintenance of a large effective population  
487 size precluded significant genetic drift. Persistent connectivity between forest patches may have  
488 been key in this process, particularly during climatic fluctuations of the Late Quaternary that  
489 may have contributed to fragmenting habitat, as suggested for other species of the LM region  
490 (Quéméré *et al.*, 2012; Salmona *et al.*, 2017b). Secondly, the genus *Noronhia* has extremely  
491 diversified in northern Madagascar (Hong-Wa, 2016), and about 30 taxa have been recently  
492 recorded and sampled in the LM region (JS & GB, unpublished data). What caused such  
493 diversification remains unknown. The co-occurrence of closely related taxa may offer some  
494 opportunities for hybridization events, which could have contributed to the increased genetic  
495 diversity in *N. spinifolia*. However, the cpSSR characterization of four sympatric/parapatric LM  
496 *Noronhia* (i.e. *N. candicans*, *N. clarinerva*, *N. crassinodis* and *N. intermedia*; > 200 individuals),  
497 closely related to *N. spinifolia* (according to cpDNA and nrDNA data; Salmona *et al.*, 2020),  
498 shows that these species have no shared chlorotype with our study model (GB, unpubl. data),  
499 thus suggesting that maternal introgression events to *N. spinifolia*, if any, may not be recent.  
500 Lastly, high mutation rate may also contribute to the high genetic diversity in *N. spinifolia*. An  
501 obvious acceleration of the mitogenome evolutionary rate has been recently documented in the  
502 closely related species *N. candicans*, *N. clarinerva*, *N. intermedia* and *N. spinifolia*, with a high  
503 number of di- or tri-nucleotide mutations possibly reflecting frequent mtDNA recombination in  
504 this clade (Van de Paer, 2017), as also suggested by a lack of LD between some SNPs. While  
505 accelerated mutation rate was missing on the plastome (Salmona *et al.*, 2020), we are still  
506 lacking any evidence for the nuclear genome. Such accelerated evolutionary rate could result  
507 from relatively frequent and recurrent hybridization events in this group, promoting genomic  
508 instability (Fontdevila, 2005; Payseur & Rieseberg, 2016). Moreover, the strong linear



509 relationship between geographic and genetic distance could preclude cryptic radiation (Pillon *et*  
510 *al.*, 2014) and microgeographic adaptation (Scotti *et al.*, 2016) as major drivers of the observed  
511 diversity. In conclusion, the surprisingly high genetic diversity calls for the identification of the  
512 evolutionary, ecological and/or molecular mechanisms underlying this peculiar pattern.

## 513 **Landscape effects on the genetic diversity of *Noronhia spinifolia***

### 514 A strong continuous spatial structure

515 Beyond revealing surprisingly high levels of diversity, our results also show complementary  
516 signals of a strong continuous structure in space (PCA, clustering and IBD), from both organelles  
517 and the nucleus, in contrast to generally expected incongruent patterns among genomes  
518 (Olofsson *et al.*, 2019; Bianconi *et al.*, 2020). While the northwest-southeast differentiation cline  
519 represented as much as ~15% of the variance of the PCA, the geographic Euclidean distance  
520 alone explained up to ~55% of the nuclear genetic variance using IBD tests. This strong pattern  
521 of nuclear genetic structure sharply contrasts with the absence of nuclear spatial structure in the  
522 savanna olive tree, *N. lowryi* (Salmona *et al.*, 2020). However, reported IBD patterns in trees  
523 show a wide range from low values in *Dalbergia monticola* across eastern Madagascar humid  
524 forests [ $R^2 = 0.18$ ; (Andrianoelina *et al.*, 2009)], or *Coffea mauritiana* in the Reunion Island [ $R^2$   
525 = 0.21; (Garot *et al.*, 2019)], to high values in *Swietenia macrophylla* in Central America [ $R^2 =$   
526 0.62; (McRae & Beier, 2007)]. Unexpectedly, this genetic structure was here extremely well  
527 explained by the vegetation cover (percent tree cover; mtDNA  $R^2 = 0.38$ ; nDNA  $R^2 = 0.90$ ),  
528 releasing IBD to account mostly for collinearity with the forest cover. Although strong landscape  
529 effects were also found in *S. macrophylla* (McRae & Beier, 2007), we report a unique evidence  
530 of a strong habitat fragmentation effect explained mostly by one landscape variable.

### 531 On seed-mediated gene flow: the organellar DNA testimony

532 Although organellar IBR patterns (Figs S19, S21-24) suggest that seed-mediated gene flow is  
533 driven by forest cover, the recovered pattern was of lower intensity than for pollen-mediated  
534 gene flow (nDNA). Despite slope and watershed networks being candidates for barochory and  
535 hydrochory, we could not recover any landscape variable (other than forest cover) with  
536 noticeable effect on seed dispersal. Similarly, the overall structures of organellar haplotype

537 networks (Figs 2, S17-18) are coherent with the geographic repartition of forests, and in line with  
538 the effect of the forest cover. These prevailing effects of forest cover suggest that seed dispersal  
539 may be primarily performed by forest-dwelling animals (zoochory), especially those with limited  
540 and/or rare across-forest movements, such as lemurs, rodents and territorial birds (Quéméré *et al.*  
541 *al.*, 2010; Rakotoarisoa *et al.*, 2013a; Sgarlata *et al.*, 2018; Aleixo-Pais *et al.*, 2019). However,  
542 the networks also show multiple potential fluxes among forests, hence supporting the network  
543 complementarity to the IBR approach. Several non-exclusive interpretations can be invoked for  
544 explaining these patterns: (i) relevant landscape variables are not included or of low resolution  
545 (e.g. forest type and climatic variables); (ii) the cpDNA and mtDNA diversities are confounded  
546 by homoplasy, recombination, strong drift, long-term phylogenetic or demographic history; and  
547 (iii) seed dispersal also result from infrequent seed ingestion by wide-ranging birds (or other  
548 vertebrates).

#### 549 A deep forest cover effect on gene flow

550 Unlike organellar DNAs, nDNA diversity is deeply explained by the LM region forest cover  
551 (Fig. 4). While this partially confirms the effect of forest cover on seed dispersal since nDNA  
552 diversity is influenced by both seed and pollen movement, wind-mediated pollen dispersal  
553 favored in open-canopy environments is not supported here. It thus further sustains that pollen  
554 dispersal is mediated by forest-dwelling organisms with movements limited by open-canopy  
555 environments. Insect-mediated pollen dispersal in *N. spinifolia* is also strongly suggested by its  
556 flower morphology and color (Hong-Wa, 2016). However, the currently limited knowledge of  
557 the Malagasy entomofauna and plant-pollinator networks prevents us from clearly identifying  
558 this species' forest-dwelling pollinators.

### 559 **The antiquity of forest fragmentation in northern Madagascar**

560 Our results further support a long-standing forest fragmentation in the LM region. First, the  
561 better fit of all recent forest cover (2000's), compared to older vegetation cover (1953, 1973),  
562 suggests that the small forest changes that have occurred through this period (Quéméré *et al.*,  
563 2012) are unable to explain the genetic diversity of *N. spinifolia*. These mild landscape changes  
564 in the LM region contrast with the high deforestation rates observed throughout Madagascar  
565 since the fifties (Hansen *et al.*, 2013; Vieilledent *et al.*, 2018). Under such high recent

566 deforestation rates, a better fit of the recent forest cover layer would be very unlikely, even  
567 considering that its better resolution could positively bias its fit. Second, because we mostly  
568 genotyped fully-grown mature trees, and since the generation time of *Noronhia* is potentially  
569 long [ $>20$ -50 years; (Salmona *et al.*, 2020)], the genetic diversity is expected to reflect ancient  
570 forest cover. The time lag for a particular landscape feature to imprint its effects in the genetic  
571 diversity of a species, has been little studied (Landguth *et al.*, 2010; Mona *et al.*, 2014).  
572 However, in *N. spinifolia*, based on the strength of the signal, the high level of diversity and of  
573 gene-flow, the re-shuffling of allele frequencies after fragmentation can be roughly expected to  
574 last at least 40 generations, before harboring the signature of the new geographical pattern. This  
575 suggests that the landscape changes leading to the current forest cover are at least ~800 years (40  
576 generations x 20 years), i.e. long pre-dating the most ancient available layer (1953). The strong  
577 genetic correlation with the recent forest cover is, therefore, sound evidence that the landscape of  
578 the LM region was relatively stable at least for the last century (i.e. when most of Madagascar's  
579 deforestation occurred), and possibly the last millennium. This result concurs with those of  
580 recent studies (Quéméré *et al.*, 2012; Salmona *et al.*, 2020) supporting the a relative antiquity of  
581 forest fragmentation in Northern Madagascar. Furthermore, both the high diversity of *Noronhia*  
582 *spinifolia*, and its predominant distribution in low-elevation dry forest suggests that this habitat  
583 type may have been spatially, topographically, and temporally extensive in northern Madagascar,  
584 albeit frequently fragmented, as seemingly evidenced by a rare and likely relictual occurrence of  
585 the species in contemporary high-elevation humid forest (e.g. Binara) and similarly peculiar  
586 presence further north (e.g. Montagne des Français). To assess forest-cover changes over a larger  
587 timeframe (e.g. the last ten or so millennia), inferences of *N. spinifolia*'s demography over time  
588 would be relevant (Salmona *et al.*, 2017a; Beichman *et al.*, 2018). Coupling these inferences,  
589 with that of short-generation grassland organisms, would also help clarifying the dynamics of  
590 fire-prone open-canopy environments, through the succession of environmental changes that  
591 occurred during last millennia, namely the last-glacial-maximum, early human's colonization,  
592 the mid-Holocene transition, and the 1-Kya expansion of agro-pastoralism.

## 593 **Further prospects and conservation implications**

594 The power of coupling genomic data to landscape genetics allowed not only identifying major  
595 landscape components influencing effective dispersal, but also their respective effects on seed

596 and pollen dispersal. This surprising result warrants further investigation using higher resolution  
597 landscape and environmental layers, not used, or not available to our study. In particular, it  
598 would benefit from the use of forest type, soil type, land use, and climate data of better  
599 resolution. In addition, the wind effect has been tested without considering its directionality.  
600 Recent analytical advances allowing wind directionality integration within a landscape genetics  
601 framework (Fernández-López & Schliep, 2018) may allow to formally test its effect on pollen  
602 dispersal. Furthermore, while our study clearly identifies that seed and pollen are dispersed by  
603 forest-dwelling organisms, it neither identifies these organisms nor does it clearly show that seed  
604 and pollen do still effectively disperse among forests. These questions could be tackled (i) by  
605 inferring pedigree data from high density population sampling, coupled with sampling of young  
606 trees and seedlings, (ii) using field survey of potential dispersers during flowering and  
607 fructification (e.g. camera tracking), and/or (iii) using metabarcoding approaches to assess the  
608 interaction network within the LM forests.

609 While our study confirms the biological importance of the LM region, which is known  
610 for its species richness and endemism across taxa (Goodman & Wilmé, 2006; Rakotondravony,  
611 2006, 2009; Sgarlata *et al.*, 2019), and more specifically for the genus *Noronhia* (Hong-Wa,  
612 2016), our results also have several implications for biodiversity conservation in the region:

613 - First, they underscore the conservation value of the often-overlooked intraspecific genetic  
614 diversity, which is unexpectedly high in *N. spinifolia*.

615 - Second, this study highlights the importance of riparian forests of the LM region for their major  
616 role both as corridors connecting forest fragments, which is supported by the fact that genetic  
617 diversity in *N. spinifolia* is explained by forest cover rather than Euclidian distance, and as  
618 vectors promoting the roles of vertebrates and insects on seed and pollen dispersal. Therefore,  
619 actively maintaining, protecting, and reforesting riparian and corridor forests, which are likely  
620 pivotal for the functional connectivity of *N. spinifolia* but also most native and endemic species  
621 of the LM region (Quéméré *et al.*, 2010; Rakotoarisoa *et al.*, 2013a; Sgarlata *et al.*, 2018; Aleixo-  
622 Pais *et al.*, 2019), remain critical conservation actions.

623 - Third, our study identifies the Binara forest as unique among the major forests of the LM  
624 region and in urgent need of deeper conservation focus. Indeed, our extensive forest survey  
625 allowed us to find and collect just a few samples in this forest, where they were found only at  
626 unexpectedly higher altitude and wetter habitat (Fig. S1). Similarly, several other Malagasy olive

627 species that are mostly distributed in dry forests (e.g. *N. ankaranensis*, *N. candicans*, *N.*  
628 *christenseniana* and *N. oblanceolata*; GB and JS unpublished data), were also found to occur  
629 only at higher altitude in the mountain evergreen forests of this region (e.g. Binara and  
630 Antsahabe). Altogether, this pattern, though unclear, echoes the peculiarities of these forests, that  
631 likely acted as refugia for numerous taxa during drier periods (Raxworthy & Nussbaum, 1995;  
632 Goodman & Wilmé, 2006; Rakotoarisoa *et al.*, 2013b; Sgarlata *et al.*, 2019).

## 633 **Data availability**

634 Raw RADseq data and RADseq mtDNA alignments have been deposited to the Short Read  
635 Archive (SRA) NCBI database under the reference PRJNA632767. Organellar microsatellite  
636 genotypes and mtRAD variants are available in Tables S7 and S8, respectively. All additional  
637 data, scripts and materials are available to readers at [10.5281/zenodo.4764651](https://doi.org/10.5281/zenodo.4764651).

## 638 **Conflict of interest disclosure**

639 The authors of this article declare that they have no financial conflict of interest with the content  
640 of this article.

## 641 **Acknowledgments**

642 We thank the Direction Générale du Ministère de l'Environnement et des Forêts de Madagascar,  
643 Madagascar's Ad Hoc Committee for Fauna and Flora, and Organizational Committee for  
644 Environmental Research (CAFF/CORE) for permission to perform this study (permits number:  
645 [49/17] & [127/18]/MEEF/SG/DGF/DSAP/SCB.Re) and for their support. We thank the local  
646 communities of Daraina and of the LM region for their warm reception and support. We thank E.  
647 Rasolondraibe and the many local guides and cooks for sharing their incomparable expertise and  
648 help in the field, *misaotra anareo jiaby*. We thank U. Suescun, C. Verbeke and M.A. Naranjo  
649 Arcos for lab assistance, L. Chikhi for comments on an earlier version of the draft and P.  
650 Raimondeau for sharing a complete, annotated mitogenome sequence of *N. clarinerva*. This  
651 work was mostly funded through an ERA-NET BiodivERsA project: INFRAGECO (Inference,  
652 Fragmentation, Genomics, and Conservation, ANR-16-EBI3-0014). We also thank the LABEX  
653 TULIP (ANR-10-LABX-0041) and CEBA (ANR-10-LABX-25-01), and the LIA BEEG-B  
654 (Laboratoire International Associé – Bioinformatics, Ecology, Evolution, Genomics and  
655 Behaviour, CNRS). We are grateful to the Get-Plage sequencing and Genotoul bioinformatics  
656 (Bioinfo Genotoul) platforms for sequencing services and providing computing resources.

## 657 **Author Contribution**

658 JS and GB designed the experiment. JS, AER, BLP, JR, CHW and GB were pivotal to field  
659 material collection and herbarium composition. JS, SM, and GB generated the genetic data. JS  
660 conducted bioinformatics and population genetic analyses. JS and AD conducted IBR analyses.  
661 JS and GB drafted a first version of the manuscript with a significant input from CHW. All co-  
662 authors agreed with the last version of the manuscript.

663



|     |                                                                                                      |    |
|-----|------------------------------------------------------------------------------------------------------|----|
| 664 | <b>Supporting Information</b>                                                                        |    |
| 665 |                                                                                                      |    |
| 666 | Supporting methods                                                                                   | 3  |
| 667 | Method S1: DNA extraction                                                                            | 3  |
| 668 | Method S2: Chloroplast microsatellites                                                               | 3  |
| 669 | Method S3: Organellar markers processing                                                             | 3  |
| 670 | Method S4: RAD sequencing                                                                            | 3  |
| 671 | Method S5: Screening the organellar genomes for RADseq loci                                          | 4  |
| 672 | Method S6: <i>De-novo</i> assembly of the nuclear loci catalog                                       | 4  |
| 673 | Method S7: SNP calling & Genotype likelihood                                                         | 4  |
| 674 | Method S8: Clustering analyses                                                                       | 5  |
| 675 | Method S9: Isolation by distance                                                                     | 5  |
| 676 | Method S10: Landscape variables, cost and resolution                                                 | 5  |
| 677 | Supporting results                                                                                   | 7  |
| 678 | Result S1: Organellar DNA genotyping                                                                 | 7  |
| 679 | Result S2: Catalog construction and genotypes data                                                   | 7  |
| 680 | Result S3: Isolation by distance                                                                     | 7  |
| 681 | Supporting tables                                                                                    | 8  |
| 682 | Table S1: Samples and genetic data used in this study                                                | 8  |
| 683 | Table S2: Characteristics of the organellar DNA microsatellites                                      | 8  |
| 684 | Table S3: Characteristics of the mtDNA variants obtained from RADseq data (mtRAD)                    | 9  |
| 685 | Table S4: Organellar DNA differentiation among <i>Noronhia spinifolia</i> sampling sites             | 10 |
| 686 | Table S5: Nuclear genetic differentiation among <i>Noronhia spinifolia</i> sampling sites            | 11 |
| 687 | Table S6: Commonality summary results for all multi-variable models                                  | 12 |
| 688 | Table S7: Organellar microsatellite genotypes                                                        | 12 |
| 689 | Table S8: Mitochondrial RADseq genotypes                                                             | 12 |
| 690 | Supporting figures                                                                                   | 13 |
| 691 | Figure S1: Altitudinal distribution range of <i>Noronhia spinifolia</i> in the Loky-Manambato region | 13 |
| 692 | Figure S2: Linkage disequilibrium in chloroplast microsatellites data                                | 14 |
| 693 | Figure S3: Linkage disequilibrium in mitochondrial data                                              | 15 |
| 694 | Figure S4: Linkage disequilibrium in organellar DNA data                                             | 16 |
| 695 | Figure S5: Selecting ustacks parameters for <i>Noronhia spinifolia</i>                               | 17 |
| 696 | Figure S6: Selecting cstacks parameters for <i>Noronhia spinifolia</i>                               | 18 |
| 697 | Figure S7: Assessing <i>Noronhia spinifolia</i> RAD catalog contaminations                           | 19 |
| 698 | Figure S8: Number of nuclear genetic clusters best explaining the data when using NgsAdmix           | 20 |
| 699 | Figure S9: Number of nuclear genetic clusters best explaining the data when using Admixture          | 21 |
| 700 | Figure S10: Genetic structure in <i>Noronhia spinifolia</i>                                          | 22 |
| 701 | Figure S11: ngsAdmix ancestry proportion estimates for K = 2 to 10                                   | 23 |
| 702 | Figure S12: Admixture ancestry proportion estimates for K = 2 to 10                                  | 24 |
| 703 | Figure S13: Geographic scale influence on isolation by distance (IBD)                                | 25 |
| 704 | Figure S14: <i>Noronhia spinifolia</i> 's genetic diversity                                          | 26 |
| 705 | Figure S15: Spatial distribution of nuclear genetic diversity in <i>Noronhia spinifolia</i>          | 27 |
| 706 | Figure S16: Altitude effect on <i>Noronhia spinifolia</i> 's genetic diversity                       | 28 |
| 707 | Figure S17: <i>Noronhia spinifolia</i> mtDNA haplotype network                                       | 29 |
| 708 | Figure S18: <i>Noronhia spinifolia</i> chlorotype network                                            | 30 |
| 709 | Figure S19: Isolation by distance in <i>Noronhia spinifolia</i>                                      | 31 |
| 710 | Figure S20: Principal component analysis of nuclear genomic data of <i>Noronhia spinifolia</i>       | 32 |
| 711 | Figure S21: Univariate variable selection for chloroplast data                                       | 33 |
| 712 | Figure S22: Univariate variable selection for mitochondrial data                                     | 34 |
| 713 | Figure S23: Univariate variable selection for organellar data                                        | 35 |
| 714 | Figure S24: Univariate variable selection for nuclear data                                           | 36 |
| 715 | Figure S25: Effect of weight of combined organellar data on isolation by distance (IBD)              | 37 |
| 716 | References                                                                                           | 38 |
| 717 |                                                                                                      |    |

## 718 References

- 719 Aleixo-Pais I, Salmona J, Sgarlata GM, Rakotonanahary A, Sousa AP, Parreira B, Kun-  
720 Rodrigues C, Ralantoharijaona T, Jan F, Rasolondraibe E, *et al.* 2019. The genetic structure of a  
721 mouse lemur living in a fragmented habitat in northern Madagascar. *Conservation Genetics* 20:  
722 229–243.
- 723 Alexander DH, Novembre J, Lange K. 2009. Fast model-based estimation of ancestry in  
724 unrelated individuals. *Genome Research* 19: 1655–1664.
- 725 Allendorf FW, Hohenlohe PA, Luikart G. 2010. Genomics and the future of conservation  
726 genetics. *Nature Reviews Genetics* 11: 697–709.
- 727 Andrews KR, Good JM, Miller MR, Luikart G, Hohenlohe PA. 2016. Harnessing the power of  
728 RADseq for ecological and evolutionary genomics. *Nature Reviews Genetics* 17: 81–92.
- 729 Andrianoelina O, Favreau B, Ramamonjisoa L, Bouvet J-M. 2009. Small effect of fragmentation  
730 on the genetic diversity of *Dalbergia monticola*, an endangered tree species of the eastern forest  
731 of Madagascar, detected by chloroplast and nuclear microsatellites. *Annals of Botany* 104: 1231–  
732 1242.
- 733 Baguette M, Van Dyck H. 2007. Landscape connectivity and animal behavior: functional grain  
734 as a key determinant for dispersal. *Landscape Ecology* 22: 1117–1129.
- 735 Baird NA, Etter PD, Atwood TS, Currey MC, Shiver AL, Lewis ZA, Selker EU, Cresko WA,  
736 Johnson EA. 2008. Rapid SNP discovery and genetic mapping using sequenced RAD markers.  
737 *PLoS One* 3: e3376.
- 738 Balkenhol N, Cushman S, Storfer A, Waits L (Eds.). 2016. *Landscape genetics: concepts,*  
739 *methods, applications.* Oxford: John Wiley & Sons.
- 740 Beichman AC, Huerta-Sanchez E, Lohmueller KE. 2018. Using genomic data to infer historic  
741 population dynamics of nonmodel organisms. *Annual Review of Ecology, Evolution, and*  
742 *Systematics* 49: 433–456.
- 743 Beier P, Majka DR, Spencer WD. 2008. Forks in the road: choices in procedures for designing  
744 wildland linkages. *Conservation Biology* 22: 836–851.
- 745 Beier P, Spencer W, Baldwin RF, McRae BH. 2011. Toward best practices for developing  
746 regional connectivity maps. *Conservation Biology* 25: 879–892.
- 747 Besnard G, Hernández P, Khadari B, Dorado G, Savolainen V. 2011. Genomic profiling of  
748 plastid DNA variation in the Mediterranean olive tree. *BMC Plant Biology* 11: 80.
- 749 Besnard G, Khadari B, Baradat P, Bervillé A. 2002. Combination of chloroplast and  
750 mitochondrial DNA polymorphisms to study cytoplasm genetic differentiation in the olive  
751 complex (*Olea europaea* L.). *Theoretical and Applied Genetics* 105: 139–144.

- 752 Besnard G, Khadari B, Navascués M, Fernández-Mazuecos M, El Bakkali A, Arrigo N, Baali-  
753 Cherif D, Brunini-Bronzini de Caraffa V, Santoni S, Vargas P. 2013. The complex history of the  
754 olive tree: from Late Quaternary diversification of Mediterranean lineages to primary  
755 domestication in the northern Levant. *Proceedings of the Royal Society B: Biological Sciences*  
756 280: 20122833.
- 757 Bianconi ME, Dunning LT, Curran EV, Hidalgo O, Powell RF, Mian S, Leitch IJ, Lundgren  
758 MR, Manzi S, Vorontsova MS, *et al.* 2020. Contrasted histories of organelle and nuclear  
759 genomes underlying physiological diversification in a grass species. *Proceedings of the Royal*  
760 *Society B: Biological Sciences* 287: 20201960.
- 761 Bond WJ, Silander Jr JA, Ranaivonasy J, Ratsirarson J. 2008. The antiquity of Madagascar's  
762 grasslands and the rise of C4 grassy biomes. *Journal of Biogeography* 35: 1743–1758.
- 763 Bruvo R, Michiels NK, D'Souza TG, Schulenburg H. 2004. A simple method for the calculation  
764 of microsatellite genotype distances irrespective of ploidy level. *Molecular Ecology* 13: 2101–  
765 2106.
- 766 Cayuela H, Boualit L, Laporte M, Prunier JG, Preiss F, Laurent A, Foletti F, Clobert J, Jacob G.  
767 2019. Kin-dependent dispersal influences relatedness and genetic structuring in a lek system.  
768 *Oecologia* 191: 97–112.
- 769 Craul M, Radespiel U, Rasolofson DW, Rakotondratsimba G, Rakotonirainy O,  
770 Rasoloharijaona S, Randrianambinina B, Ratsimbazafy J, Ratelolahy F, Randrianamboavaonjy  
771 T. 2008. Large rivers do not always act as species barriers for *Lepilemur* sp. *Primates* 49: 211–  
772 218.
- 773 Dellicour S, Prunier JG, Piry S, Eloy M-C, Bertouille S, Licoppe A, Frantz AC, Flamand M-C.  
774 2019. Landscape genetic analyses of *Cervus elaphus* and *Sus scrofa*: comparative study and  
775 analytical developments. *Heredity* 123: 228–241.
- 776 Dixon P. 2003. VEGAN, a package of R functions for community ecology. *Journal of*  
777 *Vegetation Science* 14: 927–930.
- 778 Dodd ME, Silvertown J, Chase MW. 1999. Phylogenetic analysis of trait evolution and species  
779 diversity variation among angiosperm families. *Evolution* 53: 732–744.
- 780 Everson DA, Boucher DH. 1998. Tree species-richness and topographic complexity along the  
781 riparian edge of the Potomac River. *Forest Ecology and Management* 109: 305–314.
- 782 Fahrig L. 2003. Effects of habitat fragmentation on biodiversity. *Annual Review of Ecology,*  
783 *Evolution, and Systematics* 34: 487–515.
- 784 Fanamby. 2010. *Plan de gestion environnementale et de sauvegarde sociale (PGESS). Etude*  
785 *d'impact environnemental et social (EIES) de la Nouvelle Aire Protégée Loky-Manambato.*
- 786 Fernández-López J, Schliep K. 2018. rWind: download, edit and include wind data in ecological  
787 and evolutionary analysis. *Ecography* 42: 804–810.

- 788 Fontdevila A. 2005. Hybrid genome evolution by transposition. *Cytogenetic and Genome*  
789 *Research* 110: 49–55.
- 790 Frankham R. 2010. Challenges and opportunities of genetic approaches to biological  
791 conservation. *Biological Conservation* 143: 1919–1927.
- 792 Gardiner LM, Rakotoarinivo M, Rajaovelona LR, Clubbe C. 2017. Population genetics data help  
793 to guide the conservation of palm species with small population sizes and fragmented habitats in  
794 Madagascar. *PeerJ* 5: e3248.
- 795 Gardner CJ, Waeber PO, Razafindratsima OH, Wilmé L. 2018. Decision complacency and  
796 conservation planning. *Conservation Biology* 32: 1469–1472.
- 797 Garot E, Joët T, Combes M-C, Lashermes P. 2019. Genetic diversity and population divergences  
798 of an indigenous tree (*Coffea mauritiana*) in Reunion Island: role of climatic and geographical  
799 factors. *Heredity* 122: 833–847.
- 800 Gautier L, Ranirison P, Nusbaumer L, Wohlhauser S. 2006. Aperçu des massifs forestiers de la  
801 région Loky-Manambato. *Inventaires de la faune et de la flore du nord de Madagascar dans la*  
802 *région Loky-Manambato, Analamerana et Andavakoera. Série Sciences Biologiques* 23: 81–99.
- 803 Godfrey LR, Crowley BE. 2016. Madagascar’s ephemeral palaeo-grazer guild: who ate the  
804 ancient C4 grasses? *Proceedings of the Royal Society B: Biological Sciences* 283: 20160360.
- 805 Goodman SM, Benstead JP. 2003. *Natural history of Madagascar*. Chicago and London:  
806 University Chicago Press.
- 807 Goodman SM, Raherilalao MJ, Wohlhauser S. 2018. *The terrestrial protected areas of*  
808 *Madagascar: their history, description, and biota*. Chicago: University of Chicago Press.
- 809 Goodman SM, Wilmé L. 2006. Inventaires de la faune et de la flore du nord de Madagascar dans  
810 la région Loky-Manambato, Analamerana et Andavakoera. *Recherche pour le Développement* 23:  
811 1–238.
- 812 Goudie AS. 2018. *Human impact on the natural environment: Past, present and future*.  
813 Hoboken, NJ: Wiley-Blackwell.
- 814 Graves TA, Beier P, Royle JA. 2013. Current approaches using genetic distances produce poor  
815 estimates of landscape resistance to interindividual dispersal. *Molecular Ecology* 22: 3888–3903.
- 816 Hackel J, Vorontsova MS, Nanjarisoa OP, Hall RC, Razanatsoa J, Malakasi P, Besnard G. 2018.  
817 Grass diversification in Madagascar: in situ radiation of two large C3 shade clades and support  
818 for a Miocene to Pliocene origin of C4 grassy biomes. *Journal of Biogeography* 45: 750–761.
- 819 Haddad NM, Brudvig LA, Clobert J, Davies KF, Gonzalez A, Holt RD, Lovejoy TE, Sexton JO,  
820 Austin MP, Collins CD. 2015. Habitat fragmentation and its lasting impact on Earth’s  
821 ecosystems. *Science Advances* 1: e1500052.

- 822 Hall N, Mercer L, Phillips D, Shaw J, Anderson AD. 2012. Maximum likelihood estimation of  
823 individual inbreeding coefficients and null allele frequencies. *Genetics Research* 94: 151–161.
- 824 Hansen MC, Potapov PV, Moore R, Hancher M, Turubanova SA, Tyukavina A, Thau D,  
825 Stehman SV, Goetz SJ, Loveland TR. 2013. High-resolution global maps of 21st-century forest  
826 cover change. *Science* 342: 850–853.
- 827 Harper GJ, Steininger MK, Tucker CJ, Juhn D, Hawkins F. 2007. Fifty years of deforestation  
828 and forest fragmentation in Madagascar. *Environmental Conservation* 34: 325–333.
- 829 Heller R, Nursyifa C, Garcia Erill G, Salmons J, Chikhi L, Meisner J, Korneliussen TS,  
830 Albrechtsen A. 2021. A reference-free approach to analyze non-model RADseq data using  
831 standard Next Generation Sequencing toolkits. *Molecular Ecology Resources* 21: 1085–1097.
- 832 Holderegger R, Buehler D, Gugerli F, Manel S. 2010. Landscape genetics of plants. *Trends in*  
833 *Plant Science* 15: 675–683.
- 834 Hong-Wa C. 2016. A taxonomic revision of the genus *Noronhia* Stadtm. ex Thouars (Oleaceae)  
835 in Madagascar and the Comoro Islands. *Boissiera* 70: 1–291.
- 836 Hong-Wa C, Besnard G. 2014. Species limits and diversification in the Madagascar olive  
837 (*Noronhia*, Oleaceae). *Botanical Journal of the Linnean Society* 174: 141–161.
- 838 Isabel N, Holliday JA, Aitken SN. 2020. Forest genomics: Advancing climate adaptation, forest  
839 health, productivity, and conservation. *Evolutionary Applications* 13: 3–10.
- 840 Joseph GS, Seymour CL. 2020. Madagascan highlands: originally woodland and forest  
841 containing endemic grasses, not grazing-adapted grassland. *Proceedings of the Royal Society B*  
842 287: 20201956.
- 843 Joseph GS, Seymour CL. 2021. The unlikely ‘antiquity of Madagascar’s grasslands’:  
844 Disproportionately forest-limited endemic fauna support anthropogenic transformation from  
845 woodland. *Journal of Biogeography* DOI: 10.1111/jbi.14132.
- 846 Kamvar ZN, Brooks JC, Grünwald NJ. 2015. Novel R tools for analysis of genome-wide  
847 population genetic data with emphasis on clonality. *Frontiers in Genetics* 6: 208.
- 848 Keller D, Holderegger R. 2013. Damsselflies use different movement strategies for short-and  
849 long-distance dispersal. *Insect Conservation and Diversity* 6: 590–597.
- 850 Kimura M. 1983. *The neutral theory of molecular evolution*. Cambridge University Press.
- 851 Korneliussen TS, Albrechtsen A, Nielsen R. 2014. ANGSD: analysis of next generation  
852 sequencing data. *BMC Bioinformatics* 15: 356.
- 853 Kurtz S, Phillippy A, Delcher AL, Smoot M, Shumway M, Antonescu C, Salzberg SL. 2004.  
854 Versatile and open software for comparing large genomes. *Genome Biology* 5: R12.



- 855 Landguth EL, Cushman SA, Schwartz MK, McKelvey KS, Murphy M, Luikart G. 2010.  
856 Quantifying the lag time to detect barriers in landscape genetics. *Molecular Ecology* 19: 4179–  
857 4191.
- 858 Laurance WF, Nascimento HE, Laurance SG, Andrade A, Ewers RM, Harms KE, Luizao RC,  
859 Ribeiro JE. 2007. Habitat fragmentation, variable edge effects, and the landscape-divergence  
860 hypothesis. *PLoS One* 2: e1017.
- 861 LeBuhn G, Droege S, Connor EF, Gemmill-Herren B, Potts SG, Minckley RL, Jean RP, Kula E,  
862 Roubik DW, Wright KW. 2015. Evidence-based conservation: reply to Tepedino et al.  
863 *Conservation Biology* 29: 283–285.
- 864 Legendre P, Lapointe F-J, Casgrain P. 1994. Modeling brain evolution from behavior: a  
865 permutational regression approach. *Evolution* 48: 1487–1499.
- 866 Li H. 2013. Aligning sequence reads, clone sequences and assembly contigs with BWA-MEM.  
867 *arXiv preprint arXiv:1303.3997*.
- 868 Lindenmayer DB, Fischer J. 2013. *Habitat fragmentation and landscape change: an ecological  
869 and conservation synthesis*. Washington, DC: Island Press.
- 870 Ma T, Wang K, Hu Q, Xi Z, Wan D, Wang Q, Feng J, Jiang D, Ahani H, Abbott RJ. 2018.  
871 Ancient polymorphisms and divergence hitchhiking contribute to genomic islands of divergence  
872 within a poplar species complex. *Proceedings of the National Academy of Sciences of the United  
873 States of America* 115: E236–E243.
- 874 Mantel N. 1967. The detection of disease clustering and a generalized regression approach.  
875 *Cancer Research* 27: 209.
- 876 McRae BH. 2006. Isolation by resistance. *Evolution* 60: 1551–1561.
- 877 McRae BH, Beier P. 2007. Circuit theory predicts gene flow in plant and animal populations.  
878 *Proceedings of the National Academy of Sciences of the United States of America* 104: 19885–  
879 19890.
- 880 Meisner J, Albrechtsen A. 2018. Inferring population structure and admixture proportions in  
881 low-depth NGS data. *Genetics* 210: 719–731.
- 882 Mona S, Ray N, Arenas M, Excoffier L. 2014. Genetic consequences of habitat fragmentation  
883 during a range expansion. *Heredity* 112: 291–299.
- 884 Murcia C. 1995. Edge effects in fragmented forests: implications for conservation. *Trends in  
885 Ecology & Evolution* 10: 58–62.
- 886 Myers N, Mittermeier RA, Mittermeier CG, Da Fonseca GA, Kent J. 2000. Biodiversity hotspots  
887 for conservation priorities. *Nature* 403: 853–858.



- 888 Nater A, Greminger MP, Arora N, Schaik CP, Goossens B, Singleton I, Verschoor EJ, Warren  
889 KS, Krützen M. 2015. Reconstructing the demographic history of orang-utans using  
890 Approximate Bayesian Computation. *Molecular Ecology* 24: 310–327.
- 891 Nei M. 1972. Genetic distance between populations. *The American Naturalist* 106: 283–292.
- 892 Nei M. 1973. Analysis of gene diversity in subdivided populations. *Proceedings of the National  
893 Academy of Sciences of the United States of America* 70: 3321–3323.
- 894 Nei M. 1987. *Molecular evolutionary genetics*. Columbia University Press.
- 895 Nielsen R, Korneliussen T, Albrechtsen A, Li Y, Wang J. 2012. SNP calling, genotype calling,  
896 and sample allele frequency estimation from new-generation sequencing data. *PLoS One* 7:  
897 e37558.
- 898 Olofsson JK, Dunning LT, Lundgren MR, Barton HJ, Thompson J, Cuff N, Ariyaratne M,  
899 Yakandawala D, Sotelo G, Zeng K. 2019. Population-specific selection on standing variation  
900 generated by lateral gene transfers in a grass. *Current Biology* 29: 3921–3927.
- 901 Paris JR, Stevens JR, Catchen JM. 2017. Lost in parameter space: a road map for stacks.  
902 *Methods in Ecology and Evolution* 8: 1360–1373.
- 903 Payseur BA, Rieseberg LH. 2016. A genomic perspective on hybridization and speciation.  
904 *Molecular Ecology* 25: 2337–2360.
- 905 Pedersen C-ET, Albrechtsen A, Etter PD, Johnson EA, Orlando L, Chikhi L, Siegismund HR,  
906 Heller R. 2018. A southern African origin and cryptic structure in the highly mobile plains zebra.  
907 *Nature Ecology & Evolution* 1: 491–498.
- 908 Pembleton LW, Cogan NO, Forster JW. 2013. St AMPP: An R package for calculation of  
909 genetic differentiation and structure of mixed-ploidy level populations. *Molecular Ecology  
910 Resources* 13: 946–952.
- 911 Peterman WE. 2018. ResistanceGA: An R package for the optimization of resistance surfaces  
912 using genetic algorithms. *Methods in Ecology and Evolution* 9: 1638–1647.
- 913 Petit RJ, Hampe A. 2006. Some evolutionary consequences of being a tree. *Annual Review of  
914 Ecology, Evolution, and Systematics* 37: 187–214.
- 915 Pillon Y, Hopkins HC, Rigault F, Jaffré T, Stacy EA. 2014. Cryptic adaptive radiation in tropical  
916 forest trees in New Caledonia. *New Phytologist* 202: 521–530.
- 917 Poelstra J, Salmons J, Tiley GP, Schüßler D, Blanco MB, Andriambelason JB, Bouchez O,  
918 Campbell CR, Etter PD, Hohenlohe PA, *et al.* 2021. Cryptic patterns of speciation in cryptic  
919 primates: microendemic mouse lemurs and the multispecies coalescent. *Systematic Biology*:  
920 10.1093/sysbio/syaa053.

- 921 Pressey RL, Cabeza M, Watts ME, Cowling RM, Wilson KA. 2007. Conservation planning in a  
922 changing world. *Trends in Ecology & Evolution* 22: 583–592.
- 923 Prevosti A, Ocana J, Alonso G. 1975. Distances between populations of *Drosophila subobscura*,  
924 based on chromosome arrangement frequencies. *Theoretical and Applied Genetics* 45: 231–241.
- 925 Prunier JG, Colyn M, Legendre X, Flamand M-C. 2017. Regression commonality analyses on  
926 hierarchical genetic distances. *Ecography* 40: 1412–1425.
- 927 Prunier JG, Colyn M, Legendre X, Nimon KF, Flamand M-C. 2015. Multicollinearity in spatial  
928 genetics: separating the wheat from the chaff using commonality analyses. *Molecular Ecology*  
929 24: 263–283.
- 930 Quéméré E, Amelot X, Pierson J, Crouau-Roy B, Chikhi L. 2012. Genetic data suggest a natural  
931 prehuman origin of open habitats in northern Madagascar and question the deforestation  
932 narrative in this region. *Proceedings of the National Academy of Sciences of the United States of*  
933 *America* 109: 13028–13033.
- 934 Quéméré E, Crouau-Roy B, Rabarivola C, Louis EE, Chikhi L. 2010. Landscape genetics of an  
935 endangered lemur (*Propithecus tattersalli*) within its entire fragmented range. *Molecular*  
936 *Ecology* 19: 1606–1621.
- 937 Rakotoarisoa J-E, Raheriarisena M, Goodman SM. 2013a. A phylogeographic study of the  
938 endemic rodent *Eliurus carletoni* (Rodentia: Nesomyinae) in an ecological transition zone of  
939 northern Madagascar. *Journal of Heredity* 104: 23–35.
- 940 Rakotoarisoa J-E, Raheriarisena M, Goodman SM. 2013b. Late Quaternary climatic vegetational  
941 shifts in an ecological transition zone of northern Madagascar: insights from genetic analyses of  
942 two endemic rodent species. *Journal of Evolutionary Biology* 26: 1019–1034.
- 943 Rakotondravony HA. 2006. Patterns de la diversité des reptiles et amphibiens de la région de  
944 Loky-Manambato. *Inventaires de la faune et de la flore du nord de Madagascar dans la région*  
945 *Loky-Manambato, Analamerana et Andavakoera. Série Sciences Biologiques* 23: 101–148.
- 946 Rakotondravony HA. 2009. Aspects de la conservation des reptiles et des amphibiens dans la  
947 région de Daraina. *Madagascar Conservation & Development* 1: 15–18.
- 948 Raxworthy CJ, Nussbaum RA. 1995. Systematics, speciation and biogeography of the dwarf  
949 chameleons (*Brookesia*; Reptilia, Squamata, Chamaeleontidae) of northern Madagascar. *Journal*  
950 *of Zoology* 235: 525–558.
- 951 Reynolds J, Weir BS, Cockerham CC. 1983. Estimation of the coancestry coefficient: basis for a  
952 short-term genetic distance. *Genetics* 105: 767–779.
- 953 Rochette NC, Rivera-Colón AG, Catchen JM. 2019. Stacks 2: Analytical methods for paired-end  
954 sequencing improve RADseq-based population genomics. *Molecular Ecology* 28: 4737–4754.

- 955 Salmona J, Heller R, Lascoux M, Shafer A. 2017a. Inferring demographic history using genomic  
956 data. In: Rajora O, ed. *Population Genomics*. Cham: Springer, 511–537.
- 957 Salmona J, Heller R, Quéméré E, Chikhi L. 2017b. Climate change and human colonization  
958 triggered habitat loss and fragmentation in Madagascar. *Molecular Ecology* 26: 5203–5222.
- 959 Salmona J, Olofsson JK, Hong-Wa C, Razanatoa J, Rakotonasolo F, Ralimanana H,  
960 Randriamboavonjy T, Suescun U, Vorontsova MS, Besnard G. 2020. Late Miocene origin and  
961 recent population collapse of the Malagasy savanna olive tree (*Noronhia lowryi*). *Biological*  
962 *Journal of the Linnean Society* 129: 227–243.
- 963 Schmieder R, Edwards R. 2011. Fast identification and removal of sequence contamination from  
964 genomic and metagenomic datasets. *PLoS One* 6: e17288.
- 965 Scotti I, González-Martínez SC, Budde KB, Lalagüe H. 2016. Fifty years of genetic studies:  
966 what to make of the large amounts of variation found within populations? *Annals of Forest*  
967 *Science* 73: 69–75.
- 968 Sgarlata GM, Salmona J, Aleixo-Pais I, Rakotonanahary A, Sousa AP, Kun-Rodrigues C,  
969 Ralantoharijaona T, Jan F, Zaranaina R, Rasolondraibe E, *et al.* 2018. Genetic differentiation and  
970 demographic history of the northern rufous mouse Lemur (*Microcebus tavaratra*) across a  
971 fragmented landscape in northern Madagascar. *International Journal of Primatology* 39: 65–89.
- 972 Sgarlata GM, Salmona J, Le Pors B, Rasolondraibe E, Jan F, Ralantoharijaona T,  
973 Rakotonanahary A, Randriamaroson J, Marques AJ, Aleixo-Pais I, *et al.* 2019. Genetic and  
974 morphological diversity of mouse lemurs (*Microcebus* spp.) in northern Madagascar: The  
975 discovery of a putative new species? *American Journal of Primatology* 81: e23070.
- 976 Skotte L, Korneliussen TS, Albrechtsen A. 2013. Estimating individual admixture proportions  
977 from next generation sequencing data. *Genetics* 195: 693–702.
- 978 Slatkin M. 1993. Isolation by distance in equilibrium and non-equilibrium populations. *Evolution*  
979 47: 264–279.
- 980 Smouse PE, Long JC, Sokal RR. 1986. Multiple regression and correlation extensions of the  
981 Mantel test of matrix correspondence. *Systematic Zoology* 35: 627–632.
- 982 Solofondranohatra CL, Vorontsova MS, Hackel J, Besnard G, Cable S, Williams J, Jeannoda V,  
983 Lehmann CE. 2018. Grass functional traits differentiate forest and savanna in the Madagascar  
984 central highlands. *Frontiers in Ecology and Evolution* 6: 184.
- 985 Štorchová H, Olson MS. 2004. Comparison between mitochondrial and chloroplast DNA  
986 variation in the native range of *Silene vulgaris*. *Molecular Ecology* 13: 2909–2919.
- 987 Sutherland WJ, Pullin AS, Dolman PM, Knight TM. 2004. The need for evidence-based  
988 conservation. *Trends in Ecology & Evolution* 19: 305–308.

- 989 Tang Q, Fung T, Rheindt FE. 2020. ResDisMapper: An r package for fine-scale mapping of  
990 resistance to dispersal. *Molecular Ecology Resources* 20: 819–831.
- 991 Van de Paer C. 2017. *Structural diversity and contrasted evolution of cytoplasmic genomes in*  
992 *flowering plants: a phylogenomic approach in Oleaceae*. PhD thesis, University of Toulouse III-  
993 Paul Sabatier.
- 994 Van Etten J. 2012. R package gdistance: distances and routes on geographical grids (version 1.1-  
995 4). *Journal of Statistical Software* 76: 13.
- 996 Van Strien MJ, Holderegger R, Van Heck HJ. 2015. Isolation-by-distance in landscapes:  
997 considerations for landscape genetics. *Heredity* 114: 27–37.
- 998 Vences M. 2005. Madagascar as a model region for the study of tempo and pattern in adaptive  
999 radiations. In: Huber BA, Sinclair BJ, Lampe KH, eds. *Molecules, Organisms, Ecosystems.*  
1000 *African Biodiversity*. Boston, MA: Springer, 69–84.
- 1001 Vences M, Wollenberg KC, Vieites DR, Lees DC. 2009. Madagascar as a model region of  
1002 species diversification. *Trends in Ecology & Evolution* 24: 456–465.
- 1003 Vieilledent G, Grinand C, Rakotomalala FA, Ranaivosoa R, Rakotoarijaona J-R, Allnutt TF,  
1004 Achard F. 2018. Combining global tree cover loss data with historical national forest cover maps  
1005 to look at six decades of deforestation and forest fragmentation in Madagascar. *Biological*  
1006 *Conservation* 222: 189–197.
- 1007 Vieira FG, Fumagalli M, Albrechtsen A, Nielsen R. 2013. Estimating inbreeding coefficients  
1008 from NGS data: impact on genotype calling and allele frequency estimation. *Genome Research*  
1009 23: 1852–1861.
- 1010 Vorontsova MS, Besnard G, Forest F, Malakasi P, Moat J, Clayton WD, Ficinski P, Savva GM,  
1011 Nanjarisoa OP, Razanatsoa J. 2016. Madagascar’s grasses and grasslands: anthropogenic or  
1012 natural? *Proceedings of the Royal Society, London, Series B* 283: 20152262.
- 1013 Wang Y, Lu J, Yu J, Gibbs RA, Yu F. 2013. An integrative variant analysis pipeline for accurate  
1014 genotype/haplotype inference in population NGS data. *Genome research* 23: 833–842.
- 1015 Warmuth VM, Ellegren H. 2019. Genotype-free estimation of allele frequencies reduces bias and  
1016 improves demographic inference from RADSeq data. *Molecular Ecology Resources* 19: 586–  
1017 596.
- 1018 Wilmé L, Goodman SM, Ganzhorn JU. 2006. Biogeographic evolution of Madagascar’s  
1019 microendemic biota. *Science* 312: 1063–1065.
- 1020 Wright S. 1943. Isolation by distance. *Genetics* 28: 114–138.
- 1021 Yang J, Benyamin B, McEvoy BP, Gordon S, Henders AK, Nyholt DR, Madden PA, Heath AC,  
1022 Martin NG, Montgomery GW. 2010. Common SNPs explain a large proportion of the  
1023 heritability for human height. *Nature Genetics* 42: 565.

1024 Yoder AD, Campbell CR, Blanco MB, Dos Reis M, Ganzhorn JU, Goodman SM, Hunnicutt KE,  
1025 Larsen PA, Kappeler PM, Rasoloarison RM. 2016. Geogenetic patterns in mouse lemurs (genus  
1026 *Microcebus*) reveal the ghosts of Madagascar's forests past. *Proceedings of the National*  
1027 *Academy of Sciences of the United States of America* 113: 8049–8056.

1028
